# Supplementary material
Source: publisher figshare collection journal article supplement (https://rs.figshare.com/ndownloader/files/13290473)
Supplement: Supplementary file 1 [file 13290473]

**Supplementary material for**

**A widespread thermodynamic effect, but maintenance of biological rates through space across life’s major domains**

**Jesper G. Sørensena,b,1, Craig R. Whiteb,c, Grant A. Duffyb, and Steven L. Chownb**

aSection of Genetics, Ecology and Evolution, Department of Bioscience, Aarhus University, Ny Munkegade 116, DK-8000 Aarhus C, Denmark; bSchool of Biological Sciences and cCentre for Geometric Biology, Monash University, Victoria 3800, Australia

**Figure S1. Relationship between mean temperature of the warmest quarter of the year (as a measure of Tenv, °C) and the optimum temperature (Topt, °C) for rates of development (d-1) and growth (% d-1), locomotion speed (cm s‑1), and rate of photosynthesis (mol m-2 s-1), respectively.** Solid lines depict significant relationships from phylogenetic mixed models testing for effects of Tenv on Topt (Tables S1-S4).

**Figure S2. Relationship between mean temperature of the warmest quarter of the year (as a measure of Tenv, °C) and the natural log-transformed maximum rate (Umax) for rates of development (d-1) and growth (% d-1), locomotion speed (cm s-1), and rate of photosynthesis (mol m-2 s-1), respectively.** Statistical outcomes are provided in Tables S5-S8.

**Figure S3. Relationship between mean temperature of the warmest quarter of the year (as a measure of Tenv, °C) and the natural log-transformed maximum rate (Umax) for rates of development (d-1) and growth (% d-1), locomotion speed (cm s-1), and rate of photosynthesis (mol m-2 s-1), respectively.** Data for growth rate are subdivided by Phylum because the data in Figure 3 conceal significant interactions between Phylum and Tenv.Solid lines depict significant relationships from phylogenetic mixed models testing for significant effects of Tenv on Umax. For presentation, only phyla with at least 30 measurements are plotted. Data points are presented as values adjusted for random effect of phylogeny; raw data are presented in Figure S4.

**Figure S4. Relationship between mean temperature of the warmest quarter of the year (as a measure of Tenv, °C) and the natural log-transformed maximum rate (Umax) for rates of development (d-1) and growth (% d-1), locomotion speed (cm s-1), and rate of photosynthesis (mol m-2 s-1), respectively.** Data for growth rate are subdivided by Phylum because the data in Figure 3 conceal significant interactions between Phylum and Tenv. For presentation, only phyla with at least 30 measurements are plotted. Solid lines depict significant relationships from phylogenetic mixed models testing for significant effects of Tenv on Umax.

**Figure S5. Relationship between optimum temperature (Topt, °C) and the natural log-transformed maximum rate (Umax) for rates of development (d-1) and growth (% d-1), locomotion speed (cm s-1), and rate of photosynthesis (mol m-2 s-1), respectively.** Solid lines depict significant relationships from phylogenetic mixed models testing for significant effects of Topt on Umax (Tables S9-S12).

**Figure S6. Relationship between optimum temperature (Topt) and natural log-transformed maximum rate (umax) for rates of development (red, d-1) and growth (blue, % d‑1), locomotion speed (orange, cm s-1), and rate of photosynthesis (green), respectively.** Solid lines depict significant relationships from Table S15. Data for growth rate are subdivided by Phylum because the data in Figure 4 conceal significant interactions between Phylum and optimum temperature for growth. For presentation, only phyla with at least 30 measurements are plotted. Data points are presented as values adjusted for random effect of phylogeny and fixed effects as appropriate; raw data are presented in Figure S7.

**Figure S7. Relationship between optimum temperature (Topt) and natural log-transformed maximum rate (umax) for rates of development (red, d-1) and growth (blue, % d‑1), locomotion speed (orange, cm s-1), and rate of photosynthesis (green), respectively.** Solid lines depict significant relationships from Table S15. Data for growth rate are subdivided by Phylum because the data in Figure 4 conceal significant interactions between Phylum and optimum temperature for growth. For presentation, only phyla with at least 30 measurements are plotted.

**Figure S8. Relationship between the difference between optimum (Topt) and environmental temperature (Tenv), and a metric of seasonality calculated as the difference between the temperature of the warmest quarter and the temperature of the coolest quarter (°C) for rates of development (red, d-1) and growth (blue, % d-1), locomotion speed (orange, cm s-1), and rate of photosynthesis (green), respectively.** Seasonality is calculated as the difference between the temperature of the warmest quarter and the temperature of the coolest quarter. Solid lines depict significant relationships from Table S16. Data for locomotion speed are subdivided by substrate (terrestrial or aquatic) and Phylum because of significant interactions between substrate and Phylum (*F*3,154.9 = 3.45, p = 0.018) and between seasonality and Phylum (*F*1,85.0 = 21.9, p < 0.001). For presentation, only Phylum and method combinations with at least 30 measurements are plotted and so data are shown for chordates only, because there are no more than 16 records for each locomotion speed type for Arthropoda.

**Table S1. The relationship between optimum temperature for development rate (°C) and temperature of the warmest quarter (°C), a metric of seasonality calculated as the difference between the temperature of the warmest quarter and the temperature of the coolest quarter (°C), and body mass (mg).** Data were analysed using a phylogenetic mixed model with the significance of fixed effects calculated using Wald-type *F*-tests with conditional sums of squares and denominator degrees of freedom calculated according to Kenward and Roger (1)**.** Values in italics are the variance component estimates for the random effects and  is the proportion of variance, conditioned on the fixed effects, attributable to the random effect of phylogeny.

| **Parameter** | **Estimate** | **SE** | **F (df)** | **p** |
| --- | --- | --- | --- | --- |
| Intercept | 29.7 | 3.4 | 79.1 (1,11.4) | < 0.001 |
| ln(dry mass) | 0.48 | 0.18 | 7.10 (1,67.4) | 0.01 |
| Temp. warmest quarter | 0.075 | 0.031 | 5.89 (1,86.2) | 0.02 |
| Temp. seasonality | -0.022 | 0.026 | 0.73 (1,88.4) | 0.40 |
| *Species* | *4.30* | *1.08* |  |  |
| *Phylogeny* | *24.5* | *12.4* |  |  |
| *Residual* | *1.24* | *0.47* |  |  |
|  | 0.82 | 0.09 |  |  |

**Table S2 Relationship between optimum temperature for growth rate (°C) and temperature of the warmest quarter (°C) and a metric of seasonality calculated as the difference between the temperature of the warmest quarter and the temperature of the coolest quarter (°C).** Data were analysed using a phylogenetic mixed model with the significance of fixed effects calculated using Wald-type *F*-tests with conditional sums of squares and denominator degrees of freedom calculated according to Kenward and Roger (1). Values in italics are the variance component estimates for the random effects and  is the proportion of variance, conditioned on the fixed effects, attributable to the random effect of phylogeny.

| **Parameter** | **Estimate** | **SE** | **F (df)** | **p** |
| --- | --- | --- | --- | --- |
| Intercept | 24.5 | 4.5 | 27.0 (1,12.8) | < 0.001 |
| Temp. warmest quarter | 0.068 | 0.035 | 3.6 (1,129.4) | 0.06 |
| Temp. seasonality | -0.057 | 0.041 | 1.9 (1,127.2) | 0.17 |
| *Species* | *13.5* | *2.6* |  |  |
| *Phylogeny* | *92.1* | *38.2* |  |  |
| *Residual* | *3.69* | *0.73* |  |  |
|  | 0.84 | 0.07 |  |  |

**Table S3 Relationship between optimum temperature for locomotion speed (°C) and temperature of the warmest quarter (°C), a metric of seasonality calculated as the difference between the temperature of the warmest quarter and the temperature of the coolest quarter (°C), and body length (mm) for various measurements of locomotion speed (method: critical swim speed, running speed, sprint speed, sprint swim speed).** Data were analysed using a phylogenetic mixed model with the significance of fixed effects calculated using Wald-type *F*-tests with conditional sums of squares and denominator degrees of freedom calculated according to Kenward and Roger (1). Reference level for parameter estimates for the different methods used for estimating locomotion speed is critical swim speed. Values in italics are the variance component estimates for the random effects and  is the proportion of variance, conditioned on the fixed effects, attributable to the random effect of phylogeny.

| **Parameter** | **Estimate** | **SE** | **F (df)** | **p** |
| --- | --- | --- | --- | --- |
| Intercept | 38.2 | 10.4 | 12.9 (1,18.7) | 0.003 |
| ln(length) | -2.15 | 0.73 | 7.58 (1,124.9) | 0.007 |
| Temp. warmest quarter | 0.11 | 0.05 | 3.96 (1,153.6) | 0.048 |
| Temp. seasonality | -0.18 | 0.06 | 9.86 (1,135.6) | 0.002 |
| Method |  |  | 0.92 (3,141.6) | 0.43 |
| Method: Running speed | -0.67 | 2.03 |  |  |
| Method: Sprint speed | -2.36 | 2.87 |  |  |
| Method: Sprint swim speed | -2.00 | 1.75 |  |  |
| *Species* | *< 0.001* | *<0.001* |  |  |
| *Phylogeny* | *176.3* | *59.3* |  |  |
| *Residual* | *9.42* | *1.40* |  |  |
|  | 0.95 | 0.08 |  |  |

**Table S4 Relationship between optimum temperature for photosynthesis rate (°C) and temperature of the warmest quarter (°C) and a metric of seasonality calculated as the difference between the temperature of the warmest quarter and the temperature of the coolest quarter (°C).** Data were analysed using a phylogenetic mixed model with the significance of fixed effects calculated using Wald-type *F*-tests with conditional sums of squares and denominator degrees of freedom calculated according to Kenward and Roger (1). Values in italics are the variance component estimates for the random effects and  is the proportion of variance, conditioned on the fixed effects, attributable to the random effect of phylogeny.

| **Parameter** | **Estimate** | **SE** | **F (df)** | **p** |
| --- | --- | --- | --- | --- |
| Intercept | 24.4 | 28.6 | 0.73 (1,10.4) | 0.41 |
| Temp. warmest quarter | -0.056 | 0.078 | 0.51 (1,37.5) | 0.47 |
| Temp. seasonality | 0.13 | 0.10 | 1.63 (1,64.3) | 0.21 |
| *Species* | *3.36* | *4.54* |  |  |
| *Phylogeny* | *900.3* | *397.3* |  |  |
| *Residual* | *15.6* | *2.6* |  |  |
|  | 0.98 | 0.05 |  |  |

**Table S5. Relationship between natural log-transformed maximum development rate (d‑1) and temperature of the warmest quarter (°C), a metric of seasonality calculated as the difference between the temperature of the warmest quarter and the temperature of the coolest quarter (°C), and body mass (mg).** Data were analysed using a phylogenetic mixed model with the significance of fixed effects calculated using Wald-type *F*-tests with conditional sums of squares and denominator degrees of freedom calculated according to Kenward and Roger (1). Values in italics are the variance component estimates for the random effects and  is the proportion of variance, conditioned on the fixed effects, attributable to the random effect of phylogeny.

| **Parameter** | **Estimate** | **SE** | **F (df)** | **p** |
| --- | --- | --- | --- | --- |
| Intercept | -3.29 | 0.92 | 12.9 (1,15.8) | 0.002 |
| ln(dry mass) | -0.063 | 0.033 | 3.58 (1,97.9) | 0.06 |
| Temp. warmest quarter | 0.0044 | 0.0042 | 1.09 (1,50.9) | 0.30 |
| Temp. seasonality | 0.0001 | 0.0045 | 0.0008 (1,50.8) | 0.98 |
| *Species* | *0.099* | *0.025* |  |  |
| *Phylogeny* | *2.14* | *0.80* |  |  |
| *Residual* | *0.014* | *0.005* |  |  |
|  | 0.95 | 0.02 |  |  |

**Table S6 Relationship between natural log-transformed maximum growth rate (% d‑1) and temperature of the warmest quarter (°C) and a metric of seasonality calculated as the difference between the temperature of the warmest quarter and the temperature of the coolest quarter (°C).** Data were analysed using a phylogenetic mixed model with the significance of fixed effects calculated using Wald-type *F*-tests with conditional sums of squares and denominator degrees of freedom calculated according to Kenward and Roger (1). Values in italics are the variance component estimates for the random effects and  is the proportion of variance, conditioned on the fixed effects, attributable to the random effect of phylogeny.

| **Parameter** | **Estimate** | **SE** | **F (df)** | **p** |
| --- | --- | --- | --- | --- |
| Intercept | 3.38 | 0.77 | 19.5 (1,19.6) | < 0.001 |
| Temp. warmest quarter | 0.0068 | 0.0078 | 0.76 (1,148.5) | 0.39 |
| Temp. seasonality | -0.0037 | 0.0091 | 0.16 (1,145.8) | 0.69 |
| *Species* | *0.61* | *0.11* |  |  |
| *Phylogeny* | *2.52* | *0.92* |  |  |
| *Residual* | *0.20* | *0.04* |  |  |
|  | 0.76 | 0.08 |  |  |

**Table S7 Relationship between natural log-transformed maximum locomotion speed (cm s-1) and temperature of the warmest quarter (°C), a metric of seasonality calculated as the difference between the temperature of the warmest quarter and the temperature of the coolest quarter (°C), and body or snout-vent length (mm) for various measurements of locomotion speed (method: critical swim speed, running speed, sprint speed, sprint swim speed).** Data were analysed using a phylogenetic mixed model with the significance of fixed effects calculated using Wald-type *F*-tests with conditional sums of squares and denominator degrees of freedom calculated according to Kenward and Roger (1). Reference level for parameter estimates for the different methods used for estimating locomotion speed is Critical swim speed. Values in italics are the variance component estimates for the random effects and  is the proportion of variance, conditioned on the fixed effects, attributable to the random effect of phylogeny.

| **Parameter** | **Estimate** | **SE** | **F (df)** | **p** |
| --- | --- | --- | --- | --- |
| Intercept | 1.65 | 0.97 | 6.18 (1,15.8) | 0.02 |
| ln(length) | 0.31 | 0.07 | 20.5 (1,128.5) | < 0.001 |
| Temp. warmest quarter | 0.016 | 0.005 | 9.77 (1,109.2) | 0.002 |
| Temp. seasonality | -0.021 | 0.005 | 16.5 (1,152.0) | < 0.001 |
| Method |  |  | 85.1 (3,109.2) | < 0.001 |
| Method: Running speed | -0.21 | 0.19 |  |  |
| Method: Sprint speed | 1.29 | 0.28 |  |  |
| Method: Sprint swim speed | 0.89 | 0.18 |  |  |
| *Species* | *0.051* | *0.018* |  |  |
| *Phylogeny* | *1.52* | *0.56* |  |  |
| *Residual* | *0.036* | *0.008* |  |  |
|  | 0.95 | 0.03 |  |  |

**Table S8 Relationship between natural log-transformed maximum photosynthesis rate (mol m-2 s-1) and temperature of the warmest quarter (°C) and a metric of seasonality calculated as the difference between the temperature of the warmest quarter and the temperature of the coolest quarter (°C).** Data were analysed using a phylogenetic mixed model with the significance of fixed effects calculated using Wald-type *F*-tests with conditional sums of squares and denominator degrees of freedom calculated according to Kenward and Roger (1). Values in italics are the variance component estimates for the random effects and  is the proportion of variance, conditioned on the fixed effects, attributable to the random effect of phylogeny.

| **Parameter** | **Estimate** | **SE** | **F (df)** | **p** |
| --- | --- | --- | --- | --- |
| Intercept | 2.45 | 3.10 | 0.62 (1,7.3) | 0.46 |
| Temp. warmest quarter | -0.010 | 0.010 | 1.05 (1,63.1) | 0.31 |
| Temp. seasonality | 0.023 | 0.012 | 3.86 (1,78.8) | 0.053 |
| *Species* | *0.19* | *0.08* |  |  |
| *Phylogeny* | *10.6* | *5.6* |  |  |
| *Residual* | *0.10* | *0.02* |  |  |
|  | 0.97 | 0.02 |  |  |

**Table S9. Relationship between natural log-transformed maximum development rate (d‑1) and optimum temperature for development (TOPT, °C), a metric of seasonality calculated as the difference between the temperature of the warmest quarter and the temperature of the coolest quarter (°C), and body mass (mg).** Data were analysed using a phylogenetic mixed model with the significance of fixed effects calculated using Wald-type *F*-tests with conditional sums of squares and denominator degrees of freedom calculated according to Kenward and Roger (1). Values in italics are the variance component estimates for the random effects and  is the proportion of variance, conditioned on the fixed effects, attributable to the random effect of phylogeny.

| **Parameter** | **Estimate** | **SE** | **F (df)** | **p** |
| --- | --- | --- | --- | --- |
| Intercept | -4.52 | 1.17 | 14.8 (1,26.8) | < 0.001 |
| ln(dry mass) | -0.069 | 0.032 | 4.45 (1,98.4) | 0.04 |
| TOPT | 0.044 | 0.013 | 11.4 (1,85.5) | 0.001 |
| Temp. seasonality | -0.0001 | 0.0032 |  |  |
| *Species* | *0.069* | *0.021* |  |  |
| *Phylogeny* | *3.19* | *1.01* |  |  |
| *Residual* | *0.012* | *0.004* |  |  |
|  | 0.98 | 0.01 |  |  |

**Table S10 Relationship between natural log-transformed maximum growth rate (% d‑1) and the optimal temperature for growth rate (TOPT, °C) and a metric of seasonality calculated as the difference between the temperature of the warmest quarter and the temperature of the coolest quarter (°C).** Data were analysed using a phylogenetic mixed model with the significance of fixed effects calculated using Wald-type *F*-tests with conditional sums of squares and denominator degrees of freedom calculated according to Kenward and Roger (1). Values in italics are the variance component estimates for the random effects and  is the proportion of variance, conditioned on the fixed effects, attributable to the random effect of phylogeny.

| **Parameter** | **Estimate** | **SE** | **F (df)** | **p** |
| --- | --- | --- | --- | --- |
| Intercept | 1.55 | 0.93 | 16.9 (1,24.4) | 0.08 |
| TOPT | 0.074 | 0.013 | 30.5 (1,205.9) | < 0.001 |
| Temp. seasonality | 0.003 | 0.009 | 0.13 (1,158.3) | 0.72 |
| *Species* | *0.42* | *0.09* |  |  |
| *Phylogeny* | *3.50* | *1.16* |  |  |
| *Residual* | *0.21* | *0.04* |  |  |
|  | 0.84 | 0.05 |  |  |

**Table S11 Relationship between natural log-transformed maximum locomotion speed (cm s-1) and the optimal temperature for locomotion speed (TOPT, °C), a metric of seasonality calculated as the difference between the temperature of the warmest quarter and the temperature of the coolest quarter (°C), and body or snout-vent length (mm) for various measurement of locomotion speed (method: critical swim speed, running speed, sprint speed, sprint swim speed).** Data were analysed using a phylogenetic mixed model with the significance of fixed effects calculated using Wald-type *F*-tests with conditional sums of squares and denominator degrees of freedom calculated according to Kenward and Roger (1). Reference level for parameter estimates for locomotion speed method is critical swim speed. Values in italics are the variance component estimates for the random effects and  is the proportion of variance, conditioned on the fixed effects, attributable to the random effect of phylogeny.

| **Parameter** | **Estimate** | **SE** | **F (df)** | **p** |
| --- | --- | --- | --- | --- |
| Intercept | 0.86 | 0.93 | 5.35 (1,17.7) | 0.03 |
| ln(length) | 0.36 | 0.07 | 28.6 (1,126.2) | < 0.001 |
| TOPT | 0.024 | 0.007 | 13.1 (1,145.3) | < 0.001 |
| Temp. seasonality | -0.012 | 0.004 | 7.28 (1,142.6) | 0.008 |
| Method |  |  | 74.8 (3,110.4) | < 0.001 |
| Method: Running speed | -0.24 | 0.18 |  |  |
| Method: Sprint speed | 1.27 | 0.26 |  |  |
| Method: Sprint swim speed | 0.88 | 0.17 |  |  |
| *Species* | *0.032* | *0.016* |  |  |
| *Phylogeny* | *1.41* | *0.50* |  |  |
| *Residual* | *0.046* | *0.010* |  |  |
|  | 0.95 | 0.02 |  |  |

**Table S12 Relationship between natural log-transformed maximum photosynthesis rate (mol m-2 s-1) and the optimal temperature for photosynthesis rate (TOPT, °C) and a metric of seasonality calculated as the difference between the temperature of the warmest quarter and the temperature of the coolest quarter (°C).** Data were analysed using a phylogenetic mixed model with the significance of fixed effects calculated using Wald-type *F*-tests with conditional sums of squares and denominator degrees of freedom calculated according to Kenward and Roger (1). Values in italics are the variance component estimates for the random effects and  is the proportion of variance, conditioned on the fixed effects, attributable to the random effect of phylogeny.

| **Parameter** | **Estimate** | **SE** | **F (df)** | **p** |
| --- | --- | --- | --- | --- |
| Intercept | 1.49 | 0.29 | 27.4 (1,96.1) | < 0.001 |
| TOPT | 0.033 | 0.008 | 14.8 (1,118.5) | < 0.001 |
| Temp. seasonality | 0.019 | 0.010 | 3.94 (1,61.5) | 0.051 |
| *Species* | *0.31* | *0.08* |  |  |
| *Phylogeny* | *< 0.001* | *< 0.001* |  |  |
| *Residual* | *0.13* | *0.02* |  |  |
|  | < 0.001 | < 0.001 |  |  |

**Table S13 Relationship between natural log-transformed maximum growth rate (% d‑1) and the optimal temperature for growth rate (TOPT, °C), a metric of seasonality calculated as the difference between the temperature of the warmest quarter and the temperature of the coolest quarter (°C), and Phylum.** Data were analysed using a phylogenetic mixed model with the significance of fixed effects calculated using Wald-type *F*-tests with conditional sums of squares and denominator degrees of freedom calculated according to Kenward and Roger (1). Variance component estimates (± standard error) for the random effects of Species, Phylogeny, and Residual are 0.22 ± 0.08, 2.08 ± 1.08, and 0.23 ± 0.04, respectively, and  = 0.82 ± 0.07 ( is the proportion of variance, conditioned on the fixed effects, attributable to the random effect of phylogeny).

| **Term** | **F (df)** | **p** |
| --- | --- | --- |
| Intercept | 2.74 (1,11.4) | 0.12 |
| TOPT | 37.6 (1,171.2) | < 0.001 |
| Temp. seasonality | 0.03 (1,172.5) | 0.86 |
| Phylum | 4.41 (13,18.6) | 0.002 |
| TOPT * Phylum | 3.62 (9,146.1) | < 0.001 |

**Table S14 Relationship between natural log-transformed maximum locomotion speed (cm s-1) and the optimal temperature for locomotion speed (TOPT, °C), a metric of seasonality calculated as the difference between the temperature of the warmest quarter and the temperature of the coolest quarter (°C), phylum, body or snout-vent length (mm), and the method for locomotion speed (critical swim speed, running speed, sprint speed, sprint swim speed).** Data were analysed using a phylogenetic mixed model with the significance of fixed effects calculated using Wald-type *F*-tests with conditional sums of squares and denominator degrees of freedom calculated according to Kenward and Roger (1). Variance component estimates (± standard error) for the random effects of Species, Phylogeny, and Residual are 0.03 ± 0.01, 1.87 ± 0.63, and 0.03 ± 0.01, respectively, and  = 0.97 ± 0.01 ( is the proportion of variance, conditioned on the fixed effects, attributable to the random effect of phylogeny).

| **Term** | **F (df)** | **p** |
| --- | --- | --- |
| Intercept | 6.41 (1,18.7) | 0.02 |
| ln(length) | 23.0 (1,133.5) | < 0.001 |
| TOPT | 12.3 (1,125.1) | < 0.001 |
| Temp. seasonality (°C) | 12.9 (1,138.8) | < 0.001 |
| Method | 92.5 (3,104.6) | < 0.001 |
| Phylum | 0.16 (1,18.4) | 0.17 |
| TOPT * Method | 3.20 (3,135.4) | 0.03 |
| TOPT * Phylum | 9.01 (1,89.5) | 0.003 |
| Method * Phylum | 0.40 (1,122.7) | 0.53 |

**Table S15. Parameter estimates for the relationship between natural log-transformed rates (umax) and optimum temperature Topt (°C), accounting for a metric of seasonality calculated as the difference between the temperature of the warmest quarter and the temperature of the coolest quarter (°C).** Because of significant interaction terms (Tables S13-S14) traits are subdivided by phylum for growth rates. Estimates provided are the parameter estimate ± se from a phylogenetic mixed model, which is also provided following conversion to a *Q*10 value, and p values were calculated using Wald-type *F*-tests with conditional sums of squares and denominator degrees of freedom calculated according to Kenward and Roger (1). Activation energy (Act. E. ± se) is converted from the parameter estimate for the relationship between natural log-transformed rates and inverse optimum temperature (K) (following 2).

|  |  |  | Optimum temperature | | | |  |  |  |  | |
| --- | --- | --- | --- | --- | --- | --- | --- | --- | --- | --- | --- |
| Trait (rates/speed) | Phylum | n | Min. | Max | Estimate | se | *Q*10 | p | Act. E. | | se |
| Development |  | 118 | 20 | 39 | 0.044 | 0.013 | 1.55 | 0.001 | 0.35 | 0.10 | |
| Growth | Arthropoda | 76 | 15 | 35 | 0.049 | 0.017 | 1.64 | 0.006 | 0.38 | 0.13 | |
| Growth | Chlorophyta | 51 | 15 | 35 | 0.077 | 0.021 | 2.16 | 0.0006 | 0.59 | 0.16 | |
| Growth | Chordata | 35 | 12.2 | 32 | 0.059 | 0.030 | 1.80 | 0.064 | 0.44 | 0.22 | |
| Locomotion |  | 162 | 15 | 40.9 | 0.024 | 0.007 | 1.27 | 0.0004 | 0.18 | 0.05 | |
| Photosynthesis |  | 122 | 10.4 | 42.5 | 0.033 | 0.008 | 1.39 | 0.0002 | 0.23 | 0.07 | |

**Table S16. Parameter estimates for the relationship between the difference between optimum temperature Topt (°C) and mean temperature of the warmest quarter (°C), and a metric of seasonality calculated as the difference between the temperature of the warmest quarter and the temperature of the coolest quarter (°C).** Estimates provided are the parameter estimate ± se from a phylogenetic mixed model, with p-values calculated using Wald-type *F*-tests with conditional sums of squares and denominator degrees of freedom calculated according to Kenward and Roger (1).

| Trait (rates/speed) | Phylum | Substrate | Estimate | se | p |
| --- | --- | --- | --- | --- | --- |
| Development |  |  | -0.04 | 0.08 | 0.58 |
| Growth |  |  | -0.15 | 0.08 | 0.08 |
| Locomotion | Chordata | Sprint speed | -0.38 | 0.09 | 0.00009 |
| Locomotion | Chordata | Sprint swim speed | -0.72 | 0.15 | 0.00002 |
| Photosynthesis |  |  | -0.43 | 0.15 | 0.006 |

**Table S17. Database for “A widespread thermodynamic effect, but maintenance of biological rates through space across life’s major domains”.** The database contains records of thermal relationships between locomotion speed and rates of development, growth and photosynthesis and temperature, where a clear maximal performance (optimum temperature) was identified across plants and animals. The database contains a designation to taxonomic group used for analysis (*taxgrp*) and well as full taxonomic information (*Kingdom*, *Phylum*, *Class*, *Order*, *Family*, *Genus*, *Species* and *Full species* names). Further, in case of changes to species name *Suggested synonym* is given. For each record the *Habitat type* is given as either Terrestrial, Freshwater or Marine. *T[opt]* reflect the temperature of maximal performance in centigrade, while *ArhT[opt]* is the inverse *T[opt]* [1/*kT[opt],* where k is Boltzmann’s constant and T[opt] is in absolute temperature (K)]. *u[max]* is the maximal performance of the trait in question, i.e. the performance at T[opt] and the associated *Measured trait* and the unit with which this trait was measured (*Unit of measured trait*). *Performance trait (for T[opt])* and *Performance trait (for u[max])* were used as input variables for analyses. The following columns gives *Dry mass*, *Wet body mass* and *Body size* (snout-vent length (SVL) for reptiles and anurans or body length (BL) for fish and invertebrates, respectively). Locomotion speed is given as *SVL/s or BL/s*. SVL and BL were obtained from the original literature or estimated from other sources when not available (described for each record in comment fields inserted). Dry mass estimates were sourced from the original literature when given, or inferred from length or fresh mass measured available using specific relationships given by Hodar (3) and Ganihar (4). In all cases the sources and relationships used to generate dry mass estimates are given in the database. *Reference for species origin* states how the origin was sourced or estimated (comment fields in in the database). *Latitude* and *Longitude* signifies origin of the population investigated and *Reference* the paper documenting the thermal relationship. Finally, three columns give the MODIS Land Surface Temperature dataset (MOD11C3 v6; doi:10.5067/MODIS/MOD11C3.006; 0.05° spatial resolution, January 2001 – December 2016) environmental temperatures used for analyses. The variables used were mean temperature of the warmest quarter (*MODIS_bio10*) and mean temperature of the coldest quarter (*MODIS_bio11*), the latter which only used to calculate seasonality (the difference between the mean temperature of the warmest quarter and the mean temperature of the coldest quarter, *MODIS_seasonality*). The final column identifies the database records included (*TRUE*) or excluded (*FALSE*) from the analyses.

**References for database, Table S17.**

Acreman, S. J. and Dixon, A. F. G. (1989). The effects of temperature and host quality on the rate of increase of the grain aphid (*Sitobion avenae*) on wheat. Annals of Applied Biology 115, 3-9.

Aguilar, R. and Cruz, F. B. (2010). Refuge use in a Patagonian nocturnal lizard, *Homonota darwini*: The role of temperature. Journal of Herpetology 44, 236-241.

Allen, B. J., Rodgers, B., Tuan, Y. H. and Levinton, J. S. (2012). Size-dependent temperature and desiccation constraints on performance capacity: Implications for sexual selection in a fiddler crab. Journal of Experimental Marine Biology and Ecology 438, 93-99.

Allsopp, P. G. (1981). Development, longevity and fecundity of the false wireworms *Pterohelaeus arlingensis* and *Pterohelaeus alternatus* (Coleoptera, Tenebrionidae). 1. Effect of constant temperature. Australian Journal of Zoology 29, 605-619.

Amos, T. G. (1968). Some laboratory observations on rates of development mortality and oviposition of *Dermestes frischii* (Kug.) (Col., Dermestidae). Journal of Stored Products Research 4, 103-117.

Angilletta, M. J., Hill, T. and Robson, M. A. (2002). Is physiological performance optimized by thermoregulatory behavior?: a case study of the Eastern fence lizard, *Sceloporus undulatus*. Journal of Thermal Biology 27, 199-204.

Aspaly, G., Stejskal, V., Pekar, S. and Hubert, J. (2007). Temperature-dependent population growth of three species of stored product mites (Acari : Acaridida). Experimental and Applied Acarology 42, 37-46.

Avilla, J. and Copland, M. J. W. (1988). Development rate, number of mature oocytes at emergence and adult size of *Encarsia tricolor* at constant and variable temperatures. Entomophaga 33, 289-298.

Ba M'Hamed, T. and Chemseddine, M. (2001). Assessment of temperature effects on the development and fecundity of *Pullus mediterraneus* (Col., Coccinellidae) and consumption of *Saissetia oleae* eggs (Hom., Coccoida). Journal of Applied Entomology 125, 527-531.

Barker, J. F. and Enz, J. W. (1993). Development of laboratory reared banded sunflower moth, *Cochylis hospes* Walsingham (Lepidoptera, Cochylidae), in relation to temperature. Journal of the Kansas Entomological Society 66, 420-426.

Barlow, C. A. (1962). Influence of temperature on growth of experimental populations of *Myzus persicae* (Sulzer) and *Macrosiphum euphorbiae* (Thomas) (Aphididae). Canadian Journal of Zoology 40, 145-156.

Bauwens, D., Garland, T., Castilla, A. M. and Vandamme, R. (1995). Evolution of sprint speed in lacertid lizards - morphological, physiological, and behavioral covariation. Evolution 49, 848-863.

Bayoh, M. N. and Lindsay, S. W. (2003). Effect of temperature on the development of the aquatic stages of *Anopheles gambiae* sensu stricto (Diptera : Culicidae). Bulletin of Entomological Research 93, 375-381.

Beamish, F. W. H. (1981). Swimming performance and metabolic rate of three tropical fishes in relation to temperature. Hydrobiologia 83, 245-254.

Bear, E. A., McMahon, T. E. and Zale, A. V. (2007). Comparative thermal requirements of westslope cutthroat trout and rainbow trout: Implications for species interactions and development of thermal protection standards. Transactions of the American Fisheries Society 136, 1113-1121.

Beckett, S. J. and Evans, D. E. (1994). The demography of *Oryzaephilus surinamensis* (L) (Coleoptera, Silvanidae) on kibbled wheat. Journal of Stored Products Research 30, 121-137.

Bell, R. J. and Watters, F. L. (1982). Environmental factors influencing the development and rate of increase of *Prostephanus truncatus* (Horn) (Coleoptera, Bostrichidae) on stored maize. Journal of Stored Products Research 18, 131-142.

Benider, A., Tahiri, M., Belkoura, M. and Dauta, A. (2001). Interacting effect of heliothermic factors on the growth rate of three *Scenedesmus* species. International Journal of Limnology 37, 257-266.

Billman, E. J., Wagner, E. J. and Arndt, R. E. (2006). Effects of temperature on the survival and growth of age-0 least chub (*Iotichthys phlegethontis*). Western North American Naturalist 66, 434-440.

Birch, L. C. (1945). The influence of temperature on the development of the different stages of *Calandra oryzae* L and *Rhizopertha dominica* Fab (Coleoptera). Australian Journal of Experimental Biology and Medical Science 23, 29-35.

Birch, L. C. (1953). Experimental background to the study of the distribution and abundance of insects. 2. The relation between innate capacity for increase in numbers and the abundance of three grain beetles in experimental populations. Ecology 34, 712-726.

Bonino, M. F., Azocar, D. L. M., Tulli, M. J., Abdala, C. S., Perotti, M. G. and Cruz, F. B. (2011). Running in cold weather: Morphology, thermal biology, and performance in the southernmost lizard clade in the world (*Liolaemus lineomaculatus* Section: Liolaemini: Iguania). Journal of Experimental Zoology Part a-Ecological Genetics and Physiology 315A, 495-503.

Bouarab, L., Loudiki, M. and Dauta, A. (2002). Croissance en autotrophie et en mixotrophie de la microalgue *Micractinium pusillum* Fres. isolée d´un lagunage naturel : influence de la lumière et de la température. Journal of Water Science 15, 73-86.

Bounfour, M. and Tanigoshi, L. K. (2001). Effect of temperature on development and demographic parameters of *Tetranychus urticae* and *Eotetranychus carpini borealis* (Acari : Tetranychidae). Annals of the Entomological Society of America 94, 400-404.

Brett, J. R. and Glass, N. R. (1973). Metabolic rates and critical swimming speeds of sockeye salmon (*Oncorhynchus nerka*) in relation to size and temperature. Journal of the Fisheries Research Board of Canada 30, 379-387.

Briand, J. F., Leboulanger, C., Humbert, J. F., Bernard, C. and Dufour, P. (2004). *Cylindrospermopsis raciborskii* (Cyanobacteria) invasion at mid-latitudes: Selection, wide physiological tolerance, or global warming? Journal of Phycology 40, 231-238.

Briere, J. F. and Pracros, P. (1998). Comparison of temperature-dependent growth models with the development of *Lobesia botrana* (Lepidoptera : Tortricidae). Environmental Entomology 27, 94-101.

Bronikowski, A. M., Bennett, A. F. and Lenski, R. E. (2001). Evolutionary adaptation to temperature. VIII. Effects of temperature on growth rate in natural isolates of *Escherichia coli* and *Salmonella enterica* from different thermal environments. Evolution 55, 33-40.

Bruce, A. Y., Schulthess, F. and Mueke, J. (2009). Host acceptance, suitability, and effects of host deprivation on the West African egg parasitoid *Telenomus isis* (Hymenoptera: Scelionidae) reared on East African stemborers under varying temperature and relative humidity regimens. Environmental Entomology 38, 904-919.

Bunce, J. A. (2008). Acclimation of photosynthesis to temperature in *Arabidopsis thaliana* and *Brassica oleracea*. Photosynthetica 46, 517-524.

Burges, H. D. and Haskins, K. P. F. (1965). Life-cycle of the tropical warehouse moth, *Cadra cautella* (Wlk.), at controlled temperatures and humidities. Bulletin of Entomological Research 55, 775-789.

Busvine, J. R. (1955). Simple methods for rearing the cricket (*Gryllulus domesticus* L.) with some observations on speed of development at different temperatures. Proceedings of the Royal Entomological Society of London A 30, 15-18.

Butterwick, C., Heaney, S. I. and Talling, J. F. (2005). Diversity in the influence of temperature on the growth rates of freshwater algae, and its ecological relevance. Freshwater Biology 50, 291-300.

Carriere, Y. and Boivin, G. (1997). Evolution of thermal sensitivity of parasitization capacity in egg parasitoids. Evolution 51, 2028-2032.

Castilla, A. M. and Bauwens, D. (1991). Thermal biology, microhabitat selection, and conservation of the insular lizard *Podarcis hispanica atrata*. Oecologia 85, 366-374.

Castillo, J., Jacas, J. A., Pena, J. E., Ulmer, B. J. and Hall, D. G. (2006). Effect of temperature on life history of *Quadrastichus haitiensis* (Hymenoptera : Eulophidae), an endoparasitoid of *Diaprepes abbreviatus* (Coleoptera : Curculionidae). Biological Control 36, 189-196.

Cejudo, D. and Marquez, R. (2001). Sprint performance in the lizards *Gallotia simonyi* and *Gallotia stehlini* (Lacertidae): Implications for species management. Herpetologica 57, 87-98.

Chabi-Olaye, A., Fiaboe, M. K. and Schulthess, F. (2004). Host suitability and thermal requirements of *Lathromeris ovicida* Risbec (Hymenoptera : Trichogrammatidae), an egg parasitoid of cereal stemborers in Africa. Biological Control 30, 617-623.

Chen, X. J., Xu, X. F. and Ji, X. (2003). Influence of body temperature on food assimilation and locomotor performance in white-striped grass lizards, *Takydromus wolteri* (Lacertidae). Journal of Thermal Biology 28, 385-391.

Choi, J. W. and Peters, F. (1992). Effects of temperature on two psychrophilic ecotypes of a heterotrophic nanoflagellate, *Paraphysomonas imperforata*. Applied and Environmental Microbiology 58, 593-9.

Choi, W. I., Ryoo, M. I. and Kim, J. G. (2002). Biology of *Paronychiurus kimi* (Collembola : Onychiuridae) under the influence of temperature, humidity and nutrition. Pedobiologia 46, 548-557.

Chong, S. C., Liu, Y. T., Cummins, M., Valentine, D. L. and Boone, D. R. (2002). *Methanogenium marinum* sp. nov., a H2-using methanogen from Skan Bay, Alaska, and kinetics of H2 utilization. Antonie Van Leeuwenhoek, International Journal of General and Molecular Microbiology 81, 263-270.

Claussen, D. L., Snashall, J. and Barden, C. (2004). Effects of slope, substrate, and temperature on forces associated with locomotion of the ornate box turtle, *Terrapene ornata*. Comparative Biochemistry and Physiology a-Molecular & Integrative Physiology 138, 269-276.

Coesel, P. F. M. and Wardenaar, K. (1990). Growth responses of planktonic desmid species in a temperature light gradient. Freshwater Biology 23, 551-560.

Cohet, Y., Vouidibio, J. and David, J. R. (1980). Thermal tolerance and geographic distribution - a comparison of cosmopolitan and tropical endemic *Drosophila* species. Journal of Thermal Biology 5, 69-74.

Coles, J. F. and Jones, R. C. (2000). Effect of temperature on photosynthesis-light response and growth of four phytoplankton species isolated from a tidal freshwater river. Journal of Phycology 36, 7-16.

Cooper, V. S., Bennett, A. F. and Lenski, R. E. (2001). Evolution of thermal dependence of growth rate of *Escherichia coli* populations during 20,000 generations in a constant environment. Evolution 55, 889-896.

Cox, P. D. (1974). Influence of temperature and humidity on life cycles of *Ephestia figulilella* Gregson and *Ephestia calidella* (Guenee) (Lepidoptera: Phycitidae). Journal of Stored Products Research 10, 43-55.

Cox, P. D., Crawford, L. A., Gjestrud, G., Bell, C. H. and Bowley, C. R. (1981). The Influence of temperature and humidity on the life cycle of *Corcyra cephalonica* (Stainton) (Lepidoptera, Pyralidae). Bulletin of Entomological Research 71, 171-181.

Crill, W. D., Huey, R. B. and Gilchrist, G. W. (1996). Within- and between-generation effects of temperature on the morphology and physiology of *Drosophila melanogaster*. Evolution 50, 1205-1218.

Cromie, G. L. and Chapple, D. G. (2012). Impact of tail loss on the behaviour and locomotor performance of two sympatric *Lampropholis* skink species. PLoS ONE 7, e34732.

Crowley, S. R. (1985). Thermal sensitivity of sprint-running in the lizard *Sceloporus undulatus* - support for a conservative view of thermal physiology. Oecologia 66, 219-225.

Cunningham, S. C. and Read, J. (2002). Comparison of temperate and tropical rainforest tree species: photosynthetic responses to growth temperature. Oecologia 133, 112-119.

Danthanarayana, W. (1975). Bionomics, distribution and host range of light brown apple moth, *Epiphyas postvittana* (Walk) (Tortricidae). Australian Journal of Zoology 23, 419-437.

Darienko, T., Gustavs, L., Mudimu, O., Menendez, C. R., Schumann, R., Karsten, U., Friedl, T. and Proschold, T. (2010). *Chloroidium*, a common terrestrial coccoid green alga previously assigned to *Chlorella* (Trebouxiophyceae, Chlorophyta). European Journal of Phycology 45, 79-95.

Dauta, A., Devaux, J., Piquemal, F. and Boumnich, L. (1990). Growth rate of four freshwater algae in relation to light and temperature. Hydrobiologia 207, 221-226.

de Almeida, M. A. F., do Prado, A. P. and Geden, C. J. (2002). Influence of temperature on development time and longevity of *Tachinaephagus zealandicus* (Hymenoptera : Encyrtidae), and effects of nutrition and emergence order on longevity. Environmental Entomology 31, 375-380.

De Clercq, P. and Degheele, D. (1992). Development and survival of *Podisus maculiventris* (Say) and *Podisus sagitta* (Fab) (Heteroptera, Pentatomidae) at various constant temperatures. Canadian Entomologist 124, 125-133.

De Vis, R. M. J., Fuentes, L. E. and van Lenteren, J. C. (2002). Life history of *Amitus fuscipennis* (Hym., Platygastridae) as parasitoid of the greenhouse whitefly *Trialeurodes vaporariorum* (Hom., Aleyrodidae) on tomato as function of temperature. Journal of Applied Entomology 126, 24-33.

Dean, G. J. (1974). Effect of temperature on cereal aphids *Metopolophium dirhodum* (Wlk), *Rhopalosiphum padi* (L) and *Macrosiphum avenae* (F) (Hem Aphididae). Bulletin of Entomological Research 63, 401-409.

Deere, J. A. and Chown, S. L. (2006). Testing the beneficial acclimation hypothesis and its alternatives for locomotor performance. American Naturalist 168, 630-644.

Deloach, C. J. (1974). Rate of increase of populations of cabbage, green peach, and turnip aphids at constant temperatures. Annals of the Entomological Society of America 67, 332-340.

Dermoun, D., Chaumont, D., Thebault, J. M. and Dauta, A. (1992). Modeling of growth of *Porphyridium cruentum* in connection with two interdependent factors - light and temperature. Bioresource Technology 42, 113-117.

Doerr, M. D., Brunner, J. F. and Jones, V. P. (2002). Temperature-dependent development of *Lacanobia subjuncta* (Lepidoptera : Noctuidae). Environmental Entomology 31, 995-999.

Downton, J. and Slatyer, R. O. (1972). Temperature dependence of photosynthesis in cotton. Plant Physiology 50, 518-522.

Dreyer, B. S., Neuenschwander, P., Bouyjou, B., Baumgartner, J. and Dorn, S. (1997). The influence of temperature on the life table of *Hyperaspis notata*. Entomologia Experimentalis et Applicata 84, 85-92.

Dreyer, H. and Baumgartner, J. (1996). Temperature influence on cohort parameters and demographic characteristics of the two cowpea coreids *Clavigralla tomentosicollis* and *C. shadabi*. Entomologia Experimentalis et Applicata 78, 201-213.

Du, W. G., Lu, Y. W., Shu, L. and Bao, Y. X. (2007). Thermal dependence of food assimilation and locomotor performance in juvenile blue-tailed skinks, *Eumeces elegans*. Animal Biology 57, 29-38.

Du, W. G., Yan, S. J. and Ji, X. (2000). Selected body temperature, thermal tolerance and thermal dependence of food assimilation and locomotor performance in adult blue-tailed skinks, *Eumeces elegans*. Journal of Thermal Biology 25, 197-202.

Duale, A. H. (2005). Effect of temperature and relative humidity on the biology of the stem borer parasitoid *Pediobius furvus* (Gahan) (Hymenoptera : Eulophidae) for the management of stem borers. Environmental Entomology 34, 1-5.

Dwyer, S. A., Ghannoum, O., Nicotra, A. and Von Caemmerer, S. (2007). High temperature acclimation of C-4 photosynthesis is linked to changes in photosynthetic biochemistry. Plant Cell and Environment 30, 53-66.

Daane, K. M., Malakar-Kuenen, R. D. and Walton, V. M. (2004). Temperature-dependent development of *Anagyrus pseudococci* (Hymenoptera : Encyrtidae) as a parasitoid of the vine mealybug, *Planococcus ficus* (Homoptera : Pseudococcidae). Biological Control 31, 123-132.

Elliott, J. M. and Hurley, M. A. (1997). A functional model for maximum growth of Atlantic Salmon parr, *Salmo salar*, from two populations in northwest England. Functional Ecology 11, 592-603.

Elliott, N. C. and Kieckhefer, R. W. (1989). Effects of constant and fluctuating temperatures on immature development and age-specific life-tables of *Rhopalosiphum padi* (L) (Homoptera, Aphididae). Canadian Entomologist 121, 131-140.

Elsworth, P. G., Seebacher, F. and Franklin, C. E. (2003). Sustained swimming performance in crocodiles (*Crocodylus porosus*): Effects of body size and temperature. Journal of Herpetology 37, 363-368.

Fangue, N. A., Mandic, M., Richards, J. G. and Schulte, P. M. (2008). Swimming performance and energetics as a function of temperature in killifish *Fundulus heteroclitus*. Physiological and Biochemical Zoology 81, 389-401.

Fargues, J., Goettel, M. S., Smits, N., Ouedraogo, A. and Rougier, M. (1997). Effect of temperature on vegetative growth of *Beauveria bassiana* isolates from different origins. Mycologia 89, 383-392.

Fawley, M. W. (1984). Effects of light intensity and temperature interactions on growth characteristics of *Phaeodactylum tricornutum* (Bacillariophyceae). Journal of Phycology 20, 67-72.

Fielding, D. J. (2004). Developmental time of *Melanoplus sanguinipes* (Orthoptera : Acrididae) at high latitudes. Environmental Entomology 33, 1513-1522.

Flinn, P. W. and Hagstrum, D. W. (2002). Temperature-mediated functional response of *Theocolax elegans* (Hymenoptera : Pteromalidae) parasitizing *Rhyzopertha dominica* (Coleoptera : Bostrichidae) in stored wheat. Journal of Stored Products Research 38, 185-190.

Force, D. C. and Messenger, P. S. (1964). Fecundity, reproductive rates, and innate capacity for increase of three parasites of *Therioaphis maculata* (Buckton). Ecology 45, 706-715.

Forseth, I. N. and Ehleringer, J. R. (1982). Ecophysiology of two solar tracking desert winter annuals. 2. Leaf movements, water relations and microclimate. Oecologia 54, 41-49.

Foy, R. H., Gibson, C. E. and Smith, R. V. (1976). The influence of daylength, light intensity and temperature on the growth rates of planktonic blue-green algae. European Journal of Phycology 11, 151-163.

Franzmann, P. D., Liu, Y., Balkwill, D. L., Aldrich, H. C., Conway de Macario, E. and Boone, D. R. (1997). *Methanogenium frigidum* sp. nov., a psychrophilic, H2-using methanogen from Ace Lake, Antarctica. Int J Syst Bacteriol 47, 1068-72.

Franzmann, P. D., Springer, N., Ludwig, W., Demacario, E. C. and Rohde, M. (1992). A methanogenic archaeon from Ace Lake, Antarctica: *Methanococcoides burtonii* sp. nov. Systematic and Applied Microbiology 15, 573-581.

Franzmann, P. D., Stackebrandt, E., Sanderson, K., Volkman, J. K., Cameron, D. E., Stevenson, P. L., Mcmeekin, T. A. and Burton, H. R. (1988). *Halobacterium lacusprofundi* sp. nov., a halophilic bacterium isolated from Deep Lake, Antarctica. Systematic and Applied Microbiology 11, 20-27.

Frouz, J., Ali, A. and Lobinske, R. J. (2002). Influence of temperature on developmental rate, wing length, and larval head capsule size of pestiferous midge *Chironomus crassicaudatus* (Diptera : Chironomidae). Journal of Economic Entomology 95, 699-705.

Gaby, M. J., Besson, A. A., Bezzina, C. N., Caldwell, A. J., Cosgrove, S., Cree, A., Haresnape, S. and Hare, K. M. (2011). Thermal dependence of locomotor performance in two cool-temperate lizards. Journal of Comparative Physiology a-Neuroethology Sensory Neural and Behavioral Physiology 197, 869-875.

Gaitan-Espitia, J. D., Arias, M. B., Lardies, M. A. and Nespolo, R. F. (2013). Variation in thermal sensitivity and thermal tolerances in an invasive species across a climatic gradient: Lessons from the land snail *Cornu aspersum*. PLoS ONE 8, e70662.

Geden, C. J. (1997). Development models for the filth fly parasitoids *Spalangia gemina*, *S. cameroni*, and *Muscidifurax raptor* (Hymenoptera: Pteromalidae) under constant and variable temperatures. Biological Control 9, 185-192.

Giga, D. P. and Smith, R. H. (1983). Comparative life history studies of four *Callosobruchus* species infesting cowpeas with special reference to *Callosobruchus rhodesianus* (Pic) (Coleoptera, Bruchidae). Journal of Stored Products Research 19, 189-198.

Gilchrist, G. W. (1996). A quantitative genetic analysis of thermal sensitivity in the locomotor performance curve of *Aphidius ervi*. Evolution 50, 1560-1572.

Gilchrist, G. W., Huey, R. B. and Partridge, L. (1997). Thermal sensitivity of *Drosophila melanogaster*: Evolutionary responses of adults and eggs to laboratory natural selection at different temperatures. Physiological Zoology 70, 403-414.

Gilles, J., David, J. F. and Duvallet, G. (2005). Temperature effects on development and survival of two stable flies, *Stomoxys calcitrans* and *Stomoxys niger niger* (Diptera: muscidae), in La Reunion Island. J Med Entomol 42, 260-5.

Gillespie, D. R., Opit, G. and Roitberg, B. (2000). Effects of temperature and relative humidity on development, reproduction, and predation in *Feltiella acarisuga* (Vallot) (Diptera : Cecidomyiidae). Biological Control 17, 132-138.

Golizadeh, A., Kamali, K., Fathipour, Y. and Abbasipour, H. (2007). Temperature-dependent development of diamondback moth, *Plutella xylostella* (Lepidoptera : Plutellidae) on two brassicaceous host plants. Insect Science 14, 309-316.

Gotoh, T., Yamaguchi, K. and Mori, K. (2004). Effect of temperature on life history of the predatory mite *Amblyseius* (*Neoseiulus*) *californicus* (Acari: Phytoseiidae). Experimental & Applied Acarology 32, 15-30.

Gould, J., Venette, R. and Winograd, D. (2005). Effect of temperature on development and population parameters of *Copitarsia decolora* (Lepidoptera : Noctuidae). Environmental Entomology 34, 548-556.

Gratani, L. and Varone, L. (2004). Adaptive photosynthetic strategies of the Mediterranean maquis species according to their origin. Photosynthetica 42, 551-558.

Gregg, P. (1983). Development of the Australian plague locust *Chortoicetes terminifera*, in relation to weather. 1. Effects of constant temperature and humidity. Journal of the Australian Entomological Society 22, 247-251.

Grewal, P. S., Selvan, S. and Gaugler, R. (1994). Thermal adaptation of entomopathogenic nematodes: Niche breadth for infection, establishment, and reproduction. Journal of Thermal Biology 19, 245-253.

Guppy, J. C. (1969). Some effects of temperature on the immature stages of the armyworm, *Pseudaletia unipuncta* (Lepidoptera: Noctuidae), under controlled conditions. Canadian Entomologist 101, 1320-1327.

Guppy, J. C. and Harcourt, D. G. (1978). Effects of temperature on development of immature stages of cereal leaf beetle, *Oulema melanopus* (Coleoptera: Chrysomelidae). Canadian Entomologist 110, 257-263.

Gvozdik, L., Puky, M. and Sugerkova, M. (2007). Acclimation is beneficial at extreme test temperatures in the Danube crested newt, *Triturus dobrogicus* (Caudata, Salamandridae). Biological Journal of the Linnean Society 90, 627-636.

Gvozdik, L. and Van Damme, R. (2008). The evolution of thermal performance curves in semi-aquatic newts: Thermal specialists on land and thermal generalists in water? Journal of Thermal Biology 33, 395-403.

Hahn, M. W. and Pockl, M. (2005). Ecotypes of planktonic Actinobacteria with identical 16S rRNA genes adapted to thermal niches in temperate, subtropical, and tropical freshwater habitats. Applied and Environmental Microbiology 71, 766-773.

Halstead, D. G. H. (1967). Biological studies on species of *Palorus* and *Coelopalorus* with comparative notes on *Tribolium* and *Latheticus* (Coleoptera : Tenebrionidae). Journal of Stored Products Research 2, 273-313.

Hansen, L. S., Skovgard, H. and Hell, K. (2004). Life table study of *Sitotroga cerealella* (Lepidoptera : Gelichiidae), a strain from West Africa. Journal of Economic Entomology 97, 1484-1490.

Harries, F. H. and Douglass, J. R. (1948). Bionomic studies on the beet leafhopper. Ecological Monographs 18, 45-79.

Hauer, F. R. and Benke, A. C. (1991). Rapid growth of snag-dwelling chironomids in a blackwater river - the influence of temperature and discharge. Journal of the North American Benthological Society 10, 154-164.

Herrel, A. and Bonneaud, C. (2012). Temperature dependence of locomotor performance in the tropical clawed frog, *Xenopus tropicalis*. Journal of Experimental Biology 215, 2465-2470.

Herrel, A., Gonwouo, L. N., Fokam, E. B., Ngundu, W. I. and Bonneaud, C. (2012). Intersexual differences in body shape and locomotor performance in the aquatic frog, *Xenopus tropicalis*. Journal of Zoology 287, 311-316.

Hertz, P. E., Huey, R. B. and Nevo, E. (1983). Homage to Santa-Anita - thermal sensitivity of sprint speed in agamid lizards. Evolution 37, 1075-1084.

Higgins, J. K., MacLean, H. J., Buckley, L. B. and Kingsolver, J. G. (2014). Geographic differences and microevolutionary changes in thermal sensitivity of butterfly larvae in response to climate. Functional Ecology 28, 982-989.

Hirano, M. and Rome, L. C. (1984). Jumping performance of frogs (*Rana pipiens*) as a function of muscle temperature. Journal of Experimental Biology 108, 429-439.

Hodaifa, G., Martinez, M. E. and Sanchez, S. (2010). Influence of temperature on growth of *Scenedesmus obliquus* in diluted olive mill wastewater as culture medium. Engineering in Life Sciences 10, 257-264.

Hoddle, M. S. (2002). Developmental and reproductive biology of *Scirtothrips perseae* (Thysanoptera : Thripidae): a new avocado pest in California. Bulletin of Entomological Research 92, 279-285.

Hokanson, K. E. F., Kleiner, C. F. and Thorslund, T. W. (1977). Effects of constant temperatures and diel temperature fluctuations on specific growth and mortality rates and yield of juvenile rainbow trout, *Salmo gairdneri*. Journal of the Fisheries Research Board of Canada 34, 639-648.

Hosking, J. R. (1984). The effect of temperature on the population growth potential of *Dactylopius austrinus* De Lotto (Homoptera, Dactylopiidae), on *Opuntia aurantiaca* Lindley. Journal of the Australian Entomological Society 23, 133-139.

Howe, R. W. (1953). Studies on beetles of the family Ptinidae. 8. The intrinsic rate of increase of some Ptinid beetles. Annals of Applied Biology 40, 121-133.

Howe, R. W. (1956). The effect of temperature and humidity on the rate of development and mortality of *Tribolium castaneum* (Herbst) (Coleoptera, Tenebrionidae). Annals of Applied Biology 44, 356-368.

Howe, R. W. (1960). The effects of temperature and humidity on the rate of development and the mortality of *Tribolium confusum* Duval (Coleoptera, Tenebrionidae). Annals of Applied Biology 48, 363-376.

Howe, R. W. (1962). Effect of temperature and relative humidity on rate of development and mortality of *Tribolium madens* (Charp.) (Coleoptera, Tenebrionidae). Annals of Applied Biology 50, 649-660.

Huang, S. P. and Tu, M. C. (2009). Locomotor and elevational distribution of a mountainous lizard, *Takydromus hsuehshanensis*, in Taiwan. Zoological Studies 48, 477-484.

Huey, R. B. and Bennett, A. F. (1987). Phylogenetic studies of coadaptation: Preferred temperatures versus optimal performance temperatures of lizards. Evolution 41, 1098-1115.

Huisman, J., Tenhoopen, H. J. G. and Fuchs, A. (1980). The effect of temperature upon the toxicity of mercuric chloride to *Scenedesmus acutus*. Environmental Pollution Series a-Ecological and Biological 22, 133-148.

Ibargüengoytía, N. R., Renner, M. L., Boretto, J. M., Piantoni, C. and Cussac, V. E. (2007). Thermal effects on locomotion in the nocturnal gecko *Homonota darwini* (Gekkonidae). Amphibia-Reptilia 28, 235-246.

Imai, H., Chang, K. H., Kusaba, M. and Nakano, S. (2009). Temperature-dependent dominance of *Microcystis* (Cyanophyceae) species: *M. aeruginosa* and *M. wesenbergii*. Journal of Plankton Research 31, 171-178.

Imura, O. and Nakakita, H. (1984). The effect of temperature and relative humidity on the development of *Tribolium freemani* Hinton (Coleoptera, Tenebrionidae). Journal of Stored Products Research 20, 87-95.

Ishikawa, K., Onoda, Y. and Hikosaka, K. (2007). Intraspecific variation in temperature dependence of gas exchange characteristics among *Plantago asiatica* ecotypes from different temperature regimes. New Phytologist 176, 356-364.

Jackson, C. G., Delph, J. S. and Neemann, E. G. (1978). Development, longevity and fecundity of *Chelonus blackburni* [Hym.: Braconidae] as a Parasite of *Pectinophora gossypiella* [Lep.: Gelechiidae]. Entomophaga 23, 35-42.

Jacob, T. A. (1981). Observations on the biology of *Oryzaephilus acuminatus* Halstead with comparative notes on the common species of *Oryzaephilus* (Coleoptera, Silvanidae). Journal of Stored Products Research 17, 17-23.

Jacob, T. A. and Cox, P. D. (1977). The influence of temperature and humidity on the life cycle of *Ephestia kuehniella* Zeller (Lepidoptera: Pyralidae). Journal of Stored Products Research 13, 107-118.

James, D. G. and Taylor, A. (1992). Effect of temperature on development and survival of *Amblyseius victoriensis* (Womersley) (Acari: Phytoseiidae). International Journal of Acarology 18, 93-96.

James, D. G. and Warren, G. N. (1991). Effect of temperature on development, survival, longevity and fecundity of *Trissolcus oenone* Dodd (Hymenoptera, Scelionidae). Journal of the Australian Entomological Society 30, 303-306.

John-Alder, H. B., Morin, P. J. and Lawler, S. (1988). Thermal physiology, phenology, and distribution of tree frogs. American Naturalist 132, 506-520.

Johnson, T. P. and Bennett, A. F. (1995). The thermal acclimation of burst escape performance in fish: An integrated study of molecular and cellular physiology and organismal performance. Journal of Experimental Biology 198, 2165-2175.

Jones, E. A., Jong, A. S. and Ellerby, D. J. (2008). The effects of acute temperature change on swimming performance in bluegill sunfish *Lepomis macrochirus*. Journal of Experimental Biology 211, 1386-1393.

Jonsson, B., Forseth, T., Jensen, A. J. and Naesje, T. F. (2001). Thermal performance of juvenile Atlantic salmon, *Salmo salar* L. Functional Ecology 15, 701-711.

Katzenberger, M., Hammond, J., Duarte, H., Tejedo, M., Calabuig, C. and Relyea, R. A. (2014). Swimming with predators and pesticides: How environmental stressors affect the thermal physiology of tadpoles. PLoS ONE 9, e98265.

Katzenberger, M. J. (2009). Thermal tolerance and sensitivity of amphibian larvae from Paleartic and Neotropical communities. Master Thesis, Departamento de Biologia Animal, Faculdade de Ciências, Universidade de Lisboa, 2009, http://digital.csic.es/bitstream/10261/72486/1/Katzenberger,%20Marco.pdf.

Kelsch, S. W. and Neill, W. H. (1990). Temperature preference versus acclimation in fishes: Selection for changing metabolic optima. Transactions of the American Fisheries Society 119, 601-610.

Kemp, P. R. and Williams, G. J. (1980). A physiological basis for niche separation between *Agropyron smithii* (C3) and *Bouteloua gracilis* (C4). Ecology 61, 846-858.

Kersting, U., Satar, S. and Uygun, N. (1999). Effect of temperature on development rate and fecundity of apterous *Aphis gossypii* Glover (Hom., Aphididae) reared on *Gossypium hirsutum* L. Journal of Applied Entomology 123, 23-27.

Kim, D. S. and Riedl, H. (2005). Effect of temperature on development and fecundity of the predaceous plant bug *Deraeocoris brevis* reared on *Ephestia kuehniella* eggs. Biocontrol 50, 881-897.

Kimura, M. T., Ohtsu, T., Yoshida, T., Awasaki, T. and Lin, F. J. (1994). Climatic adaptations and distributions in the *Drosophila takahashii* species subgroup (Diptera, Drosophilidae). Journal of Natural History 28, 401-409.

King, E. G., Brewer, F. D. and Martin, D. F. (1975). Development of *Diatraea saccharalis* [Lep.: Pyralidae] at constant temperatures. Entomophaga 20, 301-306.

Kingsolver, J. G. and Woods, H. A. (1997). Thermal sensitivity of growth and feeding in *Manduca sexta* caterpillars. Physiological Zoology 70, 631-638.

Knowles, T. W. and Weigl, P. D. (1990). Thermal dependence of anuran burst locomotor performance. Copeia, 796-802.

Koehle, J. J. and Adelman, I. R. (2007). The effects of temperature, dissolved oxygen, and Asian tapeworm infection on growth and survival of the Topeka shiner. Transactions of the American Fisheries Society 136, 1607-1613.

Komazaki, S. (1982). Effects of constant temperatures on population growth of three aphid species, *Toxoptera citricidus* (Kirkaldy), *Aphis citricola* Vandergoot and *Aphis gossypii* Glover (Homoptera, Aphididae) on citrus. Applied Entomology and Zoology 17, 75-81.

Konopka, A. and Brock, T. D. (1978). Effect of temperature on blue-green algae (Cyanobacteria) in Lake Mendota. Applied and Environmental Microbiology 36, 572-576.

Kontodimas, D. C., Eliopoulos, P. A., Stathas, G. J. and Economou, L. P. (2004). Comparative temperature-dependent development of *Nephus includens* (Kirsch) and *Nephus bisignatus* (Boheman) (Coleoptera : Coccinellidae) preying on *Planococcus citri* (Risso) (Homoptera : Pseudococcidae): Evaluation of a linear and various nonlinear models using specific criteria. Environmental Entomology 33, 1-11.

Koumoundouros, G., Sfakianakis, D. G., Divanach, P. and Kentouri, M. (2002). Effect of temperature on swimming performance of sea bass juveniles. Journal of Fish Biology 60, 923-932.

Kratz, W. A. and Myers, J. (1955). Nutrition and growth of several blue-green algae. American Journal of Botany 42, 282-287.

Krenek, S., Berendonk, T. U. and Petzoldt, T. (2011). Thermal performance curves of *Paramecium caudatum*: A model selection approach. European Journal of Protistology 47, 124-137.

Kubien, D. S. and Sage, R. F. (2004). Low-temperature photosynthetic performance of a C4 grass and a co-occurring C3 grass native to high latitudes. Plant Cell and Environment 27, 907-916.

Kudo, I., Miyamoto, M., Noiri, Y. and Maita, Y. (2000). Combined effects of temperature and iron on the growth and physiology of the marine diatom, *Phaeodactylum tricornutum* (Bacillariophyceae). Journal of Phycology 36, 1096-1102.

Kuo, M. H., Lu, W. N., Chu, M. C., Kuo, Y. H. and Havang, S. H. (2006). Temperature-dependent development and population growth of *Tetraneura nigriabdominalis* (Homoptera : Pemphigidae) on three host plants. Journal of Economic Entomology 99, 1209-1213.

Lachenicht, M. W., Clusella-Trullas, S., Boardman, L., Le Roux, C. and Terblanche, J. S. (2010). Effects of acclimation temperature on thermal tolerance, locomotion performance and respiratory metabolism in *Acheta domesticus* L. (Orthoptera: Gryllidae). Journal of Insect Physiology 56, 822-830.

Lailvaux, S. P., Alexander, G. J. and Whiting, M. J. (2003). Sex-based differences and similarities in locomotor performance, thermal preferences, and escape behaviour in the lizard *Platysaurus intermedius wilhelmi*. Physiological and Biochemical Zoology 76, 511-521.

Lailvaux, S. P. and Irschick, D. J. (2007). Effects of temperature and sex on jump performance and biomechanics in the lizard *Anolis carolinensis*. Functional Ecology 21, 534-543.

Lamb, R. J., Mackay, P. A. and Gerber, G. H. (1987). Are development and growth of pea aphids, *Acyrthosiphon pisum*, in North-America adapted to local temperatures. Oecologia 72, 170-177.

Larsson, S., Forseth, T., Berglund, I., Jensen, A. J., Naslund, I., Elliott, J. M. and Jonsson, B. (2005). Thermal adaptation of Arctic charr: experimental studies of growth in eleven charr populations from Sweden, Norway and Britain. Freshwater Biology 50, 353-368.

Lasfar, S., Monette, F., Millette, L. and Azzouz, A. (2007). Intrinsic growth rate: A new approach to evaluate the effects of temperature, photoperiod and phosphorus-nitrogen concentrations on duckweed growth under controlled eutrophication. Water Research 41, 2333-2340.

Latimer, C. A. L., Wilson, R. S. and Chenoweth, S. F. (2011). Quantitative genetic variation for thermal performance curves within and among natural populations of *Drosophila serrata*. Journal of Evolutionary Biology 24, 965-975.

Lee, Y. K., Tan, H. M. and Hew, C. S. (1985). The effect of growth temperature on the bioenergetics of photosynthetic algal cultures. Biotechnology and Bioengineering 27, 555-561.

Lefkovitch, L. P. (1967). A laboratory study of *Stegobium paniceum* (L.) (Coleoptera : Anobiidae). Journal of Stored Products Research 3, 235-249.

Lehtimaki, J., Moisander, P., Sivonen, K. and Kononen, K. (1997). Growth, nitrogen fixation, and nodularin production by two Baltic sea cyanobacteria. Applied and Environmental Microbiology 63, 1647-1656.

Leibee, G. L., Pass, B. C. and Yeargan, K. V. (1979). Developmental rates of *Patasson lameerei* [Hym.: Mymaridae] and the effect of host egg age on parasitism. Entomophaga 24, 345-348.

Li, X., Hu, H. Y. and Zhang, Y. P. (2011). Growth and lipid accumulation properties of a freshwater microalga *Scenedesmus sp.* under different cultivation temperature. Bioresource Technology 102, 3098-3102.

Liu, S. S., Chen, F. Z. and Zalucki, M. P. (2002). Development and survival of the diamondback moth (Lepidoptera : Plutellidae) at constant and alternating temperatures. Environmental Entomology 31, 221-231.

Liu, Y. H. and Tsai, J. H. (2000). Effects of temperature on biology and life table parameters of the Asian citrus psyllid, *Diaphorina citri* Kuwayama (Homoptera : Psyllidae). Annals of Applied Biology 137, 201-206.

Lobinske, R. J., Ali, A. and Frouz, J. (2002). Laboratory estimation of degree-day developmental requirements of *Glyptotendipes paripes* (Diptera : Chironomidae). Environmental Entomology 31, 608-611.

Lodi, A., Binaghi, L., Solisio, C., Converti, A. and Del Borghi, M. (2003). Nitrate and phosphate removal by *Spirulina platensis*. Journal of Industrial Microbiology & Biotechnology 30, 656-660.

Logan, M. L., Fernandez, S. G. and Calsbeek, R. (2015). Abiotic constraints on the activity of tropical lizards. Functional Ecology 29, 694-700.

Londos, P. L. and Brooks, R. J. (1988). Effect of temperature acclimation on locomotory performance curves in the toad, *Bufo woodhousii woodhousii*. Copeia, 26-32.

Longstaff, B. C. and Evans, D. E. (1983). The demography of the rice weevil, *Sitophilus oryzae* (L) (Coleoptera, Curculionidae), submodels of age-specific survivorship and fecundity. Bulletin of Entomological Research 73, 333-344.

Lowry, V. K., Smith, J. W. and Mitchell, F. L. (1992). Life-fertility tables for *Frankliniella fusca* (Hinds) and *F. occidentalis* (Pergande) (Thysanoptera, Thripidae) on peanut. Annals of the Entomological Society of America 85, 744-754.

Luo, L.-G., Qu, Y.-F. and Xiang, J. I. (2006). Thermal dependence of food assimilation and sprint speed in a lacertid lizard *Eremias argus* from northern China. Acta Zoologica Sinica 52, 256-262.

Lurling, M., Eshetu, F., Faassen, E. J., Kosten, S. and Huszar, V. L. M. (2013). Comparison of cyanobacterial and green algal growth rates at different temperatures. Freshwater Biology 58, 552-559.

Lurling, M. and Van Donk, E. (1999). Grazer-induced colony formation in *Scenedesmus acutus* (Chlorophyceae): Ecomorph expression at different temperatures. Journal of Phycology 35, 1120-1126.

Lysyk, T. J. (1998a). Relationships between temperature and life-history parameters of *Stomoxys calcitrans* (Diptera : Muscidae). Journal of Medical Entomology 35, 107-119.

Lysyk, T. J. (1998b). Relationships between temperature and life history parameters of *Trichomalopsis sarcophagae* (Hymenoptera : Pteromalidae). Environmental Entomology 27, 488-498.

Lysyk, T. J. (2000). Relationships between temperature and life history parameters of *Muscidifurax raptor* (Hymenoptera : Pteromalidae). Environmental Entomology 29, 596-605.

Lysyk, T. J. (2001a). Relationships between temperature and life history parameters of *Muscidifurax raptorellus* (Hymenoptera : Pteromalidae). Environmental Entomology 30, 982-992.

Lysyk, T. J. (2001b). Relationships between temperature and life history parameters of *Muscidifurax zaraptor* (Hymenoptera : Pteromalidae). Environmental Entomology 30, 147-156.

Malinsky-Rushansky, N., Berman, T., Berner, T., Yacobi, Y. Z. and Dubinsky, Z. (2002). Physiological characteristics of picophytoplankton, isolated from Lake Kinneret: responses to light and temperature. Journal of Plankton Research 24, 1173-1183.

Mann, J. A., Axtell, R. C. and Stinner, R. E. (1990). Temperature-dependent development and parasitism rates of four species of Pteromalidae (Hymenoptera) parasitoids of house fly (*Musca domestica*) pupae. Medical and Veterinary Entomology 4, 245-253.

Marco, V., Taberner, A. and Castanera, P. (1997). Development and survival of immature *Aubeonymus mariaefranciscae* (Coleoptera: Curculionidae) at constant temperatures. Annals of the Entomological Society of America 90, 169-176.

Martinez, M. E., Jimenez, J. M. and El Yousfi, F. (1999). Influence of phosphorus concentration and temperature on growth and phosphorus uptake by the microalga *Scenedesmus obliquus.* Bioresource Technology 67, 233-240.

Matteson, J. W. and Decker, G. C. (1965). Development of European corn borer at controlled constant and variable temperatures. Journal of Economic Entomology 58, 344-349.

Mautz, W. J., Daniels, C. B. and Bennett, A. F. (1992). Thermal dependence of locomotion and aggression in a xantusiid lizard. Herpetologica 48, 271-279.

Mayo, A. W. (1997). Effects of temperature and pH on the kinetic growth of unialga *Chlorella vulgaris* cultures containing bacteria. Water Environment Research 69, 64-72.

Mazzei, K. C., Newman, R. M., Loos, A. and Ragsdale, D. W. (1999). Developmental rates of the native milfoil weevil, *Euhrychiopsis lecontei*, and damage to Eurasian watermilfoil at constant temperatures. Biological Control 16, 139-143.

Mbapila, J. C. and Overholdt, W. A. (2001). Comparative development, longevity and population growth of exotic and native parasitoids of lepidopteran cereal stemborers in Kenya. Bulletin of Entomological Research 91, 347-353.

McElroy, M. T. (2014). Countergradient variation in locomotor performance of two sympatric Polynesian skinks (*Emoia impar*, *Emoia cyanura*). Physiological and Biochemical Zoology 87, 222-230.

McMahon, T. E., Zale, A. V., Barrows, F. T., Selong, J. H. and Danehy, R. J. (2007). Temperature and competition between bull trout and brook trout: A test of the elevation refuge hypothesis. Transactions of the American Fisheries Society 136, 1313-1326.

McMullen, R. D. and Jong, C. (1977). Effect of temperature on developmental rate and fecundity of pear psylla, *Psylla pyricola* (Homoptera: Psyllidae). Canadian Entomologist 109, 165-169.

Mehnert, G., Leunert, F., Cires, S., Johnk, K. D., Rucker, J., Nixdorf, B. and Wiedner, C. (2010). Competitiveness of invasive and native cyanobacteria from temperate freshwaters under various light and temperature conditions. Journal of Plankton Research 32, 1009-1021.

Mehrnejad, M. R. (2003). The influence of host species on some biological and behavioural aspects of *Dibrachys boarmiae* (Hymenoptera: Pteromalidae), parasitoid of *Kermania pistaciella* (Lepidoptera : Tineidae). Biocontrol Science and Technology 13, 219-229.

Mehrnejad, M. R. and Jalali, M. A. (2004). Life history parameters of the coccinellid beetle, *Oenopia conglobata contaminata*, an important predator of the common pistachio psylla, *Agonoscena pistaciae* (Hemiptera : Psylloidea). Biocontrol Science and Technology 14, 701-711.

Messenger, P. S. (1968). Bioclimatic studies of the aphid parasite *Praon exsoletum*. 1. Effects of temperature on functional response of females to varying host densities. Canadian Entomologist 100, 728-741.

Messenger, P. S. and Flitters, N. E. (1958). Effect of constant temperature environments on the egg stage of three species of Hawaiian fruit flies. Annals of the Entomological Society of America 51, 109-119.

Miller, K. (1982). Effect of temperature on sprint performance in the frog *Xenopus laevis* and the salamander *Necturus maculosus*. Copeia, 695-698.

Miller, R. L. and Kamykowski, D. L. (1986). Effects of temperature, salinity, irradiance and diurnal periodicity on growth and photosynthesis in the diatom *Nitzschia american*: Light-saturated growth. Journal of Phycology 22, 339-348.

Mineo, P. M. and Schaeffer, P. J. (2015). The thermal plasticity of locomotor performance has diverged between northern and southern populations of the eastern newt (*Notophthalmus viridescens*). Journal of Comparative Physiology B-Biochemical Systemic and Environmental Physiology 185, 103-110.

Mironidis, G. K. and Savopoulou-Soultani, M. (2008). Development, survivorship, and reproduction of *Helicoverpa armigera* (Lepidoptera : Noctuidae) under constant and alternating temperatures. Environmental Entomology 37, 16-28.

Monson, R. K., Jaeger, C. H., Adams, W. W., Driggers, E. M., Silver, G. M. and Fall, R. (1992). Relationships among isoprene emission rate, photosynthesis, and isoprene synthase activity as influenced by temperature. Plant Physiology 98, 1175-1180.

Monson, R. K., Littlejohn, R. O. and Williams, G. J. (1983). Photosynthetic adaptation to temperature in four species from the Colorado shortgrass steppe: A physiological model for coexistence. Oecologia 58, 43-51.

Morgan, D., Walters, K. F. A. and Aegerter, J. N. (2001). Effect of temperature and cultivar on pea aphid, *Acyrthosiphon pisum* (Hemiptera : Aphididae) life history. Bulletin of Entomological Research 91, 47-52.

Mori, K., Nozawa, M., Arai, K. and Gotoh, T. (2005). Life-history traits of the acarophagous lady beetle, *Stethorus japonicus* at three constant temperatures. Biocontrol 50, 35-51.

Moss, B. (1973a). The influence of environmental factors on distribution of freshwater algae: An experimental study. 3. Effects of temperature, vitamin requirements and inorganic nitrogen compounds on growth. Journal of Ecology 61, 179-192.

Moss, B. (1973b). The influence of environmental factors on distribution of freshwater algae: An experimental study. 4. Growth of test species in natural lake waters, and conclusion. Journal of Ecology 61, 193-211.

Mottram, P., Kay, B. H. and Kettle, D. S. (1986). The effect of temperature on eggs and immature stages of *Culex annulirostris* Skuse (Diptera, Culicidae). Journal of the Australian Entomological Society 25, 131-135.

Muniz, M. and Nombela, G. (2001). Differential variation in development of the B- and Q-biotypes of *Bemisia tabaci* (Homoptera : Aleyrodidae) on sweet pepper at constant temperatures. Environmental Entomology 30, 720-727.

Murai, T. (2000). Effect of temperature on development and reproduction of the onion thrips, *Thrips tabaci* Lindeman (Thysanoptera : Thripidae), on pollen and honey solution. Applied Entomology and Zoology 35, 499-504.

Myrick, C. A. and Cech, J. J. (2000). Swimming performances of four California stream fishes: temperature effects. Environmental Biology of Fishes 58, 289-295.

Naidu, S. L., Moose, S. P., Al-Shoaibi, A. K., Raines, C. A. and Long, S. P. (2003). Cold tolerance of C4 photosynthesis in *Miscanthus* x *giganteus*: Adaptation in amounts and sequence of C4 photosynthetic enzymes. Plant Physiology 132, 1688-1697.

Nalewajko, C. and Murphy, T. P. (2001). Effects of temperature, and availability of nitrogen and phosphorus on the abundance of *Anabaena* and *Microcystis* in Lake Biwa, Japan: an experimental approach. Limnology 2, 45-48.

Navas, C. A. (1996). Implications of microhabitat selection and patterns of activity on the thermal ecology of high elevation neotropical anurans. Oecologia 108, 617-626.

Nobel, P. S. and Hartsock, T. L. (1981). Shifts in the optimal temperature for nocturnal CO2 uptake caused by changes in growth temperature for cacti and agaves. Physiologia Plantarum 53, 523-527.

Nobel, P. S. and Hartsock, T. L. (1984). Physiological responses of *Opuntia ficus-indica* to growth temperature. Physiologia Plantarum 60, 98-105.

Novak, J. T. and Brune, D. E. (1985). Inorganic carbon limited growth kinetics of some freshwater algae. Water Research 19, 215-225.

Nowell, L. (2014). Thermal biology and swimming energetics of bonefish (*Albula vulpes*) in Eleuthera, The Bahamas. Master Thesis, Department of Biology, Carleton University, Ottawa, Ontario, April 2014, http://www.fecpl.ca/wp-content/uploads/2013/05/LIANE-NOWELL-THESIS.pdf.

O'Steen, S. and Bennett, A. F. (2003). Thermal acclimation effects differ between voluntary, maximum, and critical swimming velocities in two cyprinid fishes. Physiological and Biochemical Zoology 76, 484-496.

Ohkubo, N., Yagi, O. and Okada, M. (1991). Effects of temperature and illumination on the growth of blue-green alga *Microcystis viridis*. Japanese Journal of Limnology 52, 255-261.

Ojanguren, A. F., Reyes-Gavilan, F. G. and Brana, F. (2001). Thermal sensitivity of growth, food intake and activity of juvenile brown trout. Journal of Thermal Biology 26, 165-170.

Okafor, A. I. (2010). The influence of body temperature on sprint speed and anti-predatory defensive responses of the North African monitor lizard, *Varanus griseus*. African Journal of Biotechnology 9, 778-781.

Ong, S. C., Kao, C. Y., Chiu, S. Y., Tsai, M. T. and Lin, C. S. (2010). Characterization of the thermal-tolerant mutants of *Chlorella sp.* with high growth rate and application in outdoor photobioreactor cultivation. Bioresource Technology 101, 2880-2883.

Ouedraogo, A., Fargues, J., Goettel, M. S. and Lomer, C. J. (1997). Effect of temperature on vegetative growth among isolates of *Metarhizium anisopliae* and *M. flavoviride*. Mycopathologia 137, 37-43.

Page, F. D. (1983). Biology of *Austroasca viridigrisea* (Paoli) (Hemiptera, Cicadellidae). Journal of the Australian Entomological Society 22, 149-153.

Paul, M. J., Lawlor, D. W. and Driscoll, S. P. (1990). The effect of temperature on photosynthesis and carbon fluxes in sunflower and rape. Journal of Experimental Botany 41, 547-555.

Pearcy, R. W., Tumosa, N. and Williams, K. (1981). Relationships between growth, photosynthesis and competitive interactions for a C3 and a C4 plant. Oecologia 48, 371-376.

Perdikis, D. C. and Lykouressis, D. P. (2002). Life table and biological characteristics of *Macrolophus pygmaeus* when feeding on *Myzus persicae* and *Trialeurodes vaporariorum*. Entomologia Experimentalis et Applicata 102, 261-272.

Petavy, G., David, J. R., Gibert, P. and Moreteau, B. (2001). Viability and rate of development at different temperatures in Drosophila: a comparison of constant and alternating thermal regimes. Journal of Thermal Biology 26, 29-39.

Pilkington, L. J. and Hoddle, M. S. (2006). Reproductive and developmental biology of *Gonatocerus ashmeadi* (Hymenoptera : Mymaridae), an egg parasitoid of *Homalodisca coagulata* (Hemiptera : Cicadellidae). Biological Control 37, 266-275.

Pittermann, J. and Sage, R. F. (2000). Photosynthetic performance at low temperature of *Bouteloua gracilis* Lag., a high-altitude C4 grass from the Rocky Mountains, USA. Plant Cell and Environment 23, 811-823.

Porter, J. (1986). Some studies on the life history and oviposition of *Carpophilus dimidiatus* (F.) (Coleoptera, Nitidulidae) at various temperatures and humidities. Journal of Stored Products Research 22, 135-139.

Pratissoli, D. and Parra, J. R. P. (2000). Fertility life table of *Trichogramma pretiosum* (Hym., Trichogrammatidae) in eggs of *Tuta absoluta* and *Phthorimaea operculella* (Lep., Gelechiidae) at different temperatures. Journal of Applied Entomology 124, 339-342.

Rae, D. J. and De'ath, G. (1991). Influence of constant temperature on development, survival and fecundity of sugarcane mealybug, *Saccharicoccus sacchari* (Cockerell) (Hemiptera, Pseudococcidae). Australian Journal of Zoology 39, 105-122.

Rapala, J., Sivonen, K., Luukkainen, R. and Niemela, S. I. (1993). Anatoxin-a concentration in *Anabaena* and *Aphanizomenon* under different environmental conditions and comparison of growth by toxic and non-toxic *Anabaena*-strains - a laboratory study. Journal of Applied Phycology 5, 581-591.

Ren, S. X., Stansly, P. A. and Liu, T. X. (2002). Life history of the whitefly predator *Nephaspis oculatus* (Coleoptera : Coccinellidae) at six constant temperatures. Biological Control 23, 262-268.

Reynolds, S. K. and Benke, A. C. (2005). Temperature-dependent growth rates of larval midges (Diptera : Chironomidae) from a southeastern US stream. Hydrobiologia 544, 69-75.

Rodriguez del Bosque, L. A., Smith, J. W. and Browning, H. W. (1989). Development and life fertility tables for *Diatraea lineolata* (Lepidoptera, Pyralidae) at constant temperatures. Annals of the Entomological Society of America 82, 450-459.

Rose, J. M., Vora, N. M., Countway, P. D., Gast, R. J. and Caron, D. A. (2009). Effects of temperature on growth rate and gross growth efficiency of an Antarctic bacterivorous protist. ISME Journal 3, 252-260.

Roy, M., Brodeur, J. and Cloutier, C. (2002). Relationship between temperature and developmental rate of *Stethorus punctillum* (Coleoptera : Coccinellidae) and its prey *Tetranychus mcdanieli* (Acarina : Tetranychidae). Environmental Entomology 31, 177-187.

Roy, M., Brodeur, J. and Cloutier, C. (2003). Effect of temperature on intrinsic rates of natural increase (rm) of a coccinellid and its spider mite prey. Biocontrol 48, 57-72.

Rueda, L. M. and Axtell, R. C. (1996). Temperature-dependent development and survival of the lesser mealworm, *Alphitobius diaperinus*. Medical and Veterinary Entomology 10, 80-86.

Ryoo, M. I. and Cho, K. J. (1988). A model for the temperature-dependent developmental rate of *Sitophilus oryzae* L. (Coleoptera, Curculionidae) on rice. Journal of Stored Products Research 24, 79-82.

Sage, R. F., Santrucek, J. and Grise, D. J. (1995). Temperature effects on the photosynthetic response of C3 plants to long-term CO2 enrichment. Vegetatio 121, 67-77.

Saker, M. L., Neilan, B. A. and Griffiths, D. J. (1999). Two morphological forms of *Cylindrospermopsis raciborskii* (Cyanobacteria) isolated from Solomon Dam, Palm Island, Queensland. Journal of Phycology 35, 599-606.

Sanchez, J. F., Fernandez-Sevilla, J. M., Acien, F. G., Ceron, M. C., Perez-Parra, J. and Molina-Grima, E. (2008). Biomass and lutein productivity of *Scenedesmus almeriensis*: influence of irradiance, dilution rate and temperature. Applied Microbiology and Biotechnology 79, 719-729.

Sandnes, J. M., Kallqvist, T., Wenner, D. and Gislerod, H. R. (2005). Combined influence of light and temperature on growth rates of *Nannochloropsis oceanica*: linking cellular responses to large-scale biomass production. Journal of Applied Phycology 17, 515-525.

Sawada, S. I. and Miyachi, S. (1974). Effects of growth temperature on photosynthetic carbon metabolism in green plants. 1. Photosynthetic activities of various plants acclimatized to varied temperatures. Plant and Cell Physiology 15, 111-120.

Schuler, M. S., Cooper, B. S., Storm, J. J., Sears, M. W. and Angilletta, M. J. (2011). Isopods failed to acclimate their thermal sensitivity of locomotor performance during predictable or stochastic cooling. PLoS ONE 6, e20905.

Seki, H., Ozawa, H. and Ichimura, S. E. (1981). Temperature-dependence of filament length of *Anabaena spiroides* Klebahn var. Crassa Lemm. Hydrobiologia 83, 419-423.

Selong, J. H., McMahon, T. E., Zale, A. V. and Barrows, F. T. (2001). Effect of temperature on growth and survival of bull trout, with application of an improved method for determining thermal tolerance in fishes. Transactions of the American Fisheries Society 130, 1026-1037.

Sharpe, P. J. H., Schoolfield, R. M. and Butler, G. D. (1981). Distribution model of *Heliothis zea* (Lepidoptera, Noctuidae) development times. Canadian Entomologist 113, 845-855.

Sheth, S. N. and Angert, A. L. (2014). The evolution of environmental tolerance and range size: A comparison of geographically restricted and widespread *Mimulus*. Evolution 68, 2917-2931.

Shires, S. W. (1979). Influence of temperature and humidity on survival, development period and adult sex ratio in *Prostephanus truncatus* (Horn) (Coleoptera, Bostrichidae). Journal of Stored Products Research 15, 5-10.

Shires, S. W. (1980). Life history of *Prostephanus truncatus* (Horn) (Coleoptera, Bostrichidae) at optimum conditions of temperature and humidity. Journal of Stored Products Research 16, 147-150.

Simankova, M. V., Parshina, S. N., Tourova, T. P., Kolganova, T. V., Zehnder, A. J. B. and Nozhevnikova, A. N. (2001). *Methanosarcina lacustris* sp. nov., a new psychrotolerant methanogenic archaeon from anoxic lake sediments. Systematic and Applied Microbiology 24, 362-367.

Singh, N., Kendall, M. M., Liu, Y. T. and Boone, D. R. (2005). Isolation and characterization of methylotrophic methanogens from anoxic marine sediments in Skan Bay, Alaska: description of *Methanococcoides alaskense* sp. nov., and emended description of *Methanosarcina baltica*. International Journal of Systematic and Evolutionary Microbiology 55, 2531-2538.

Singh, S. P. (1991). Biometrical observations on Sorghum stem borer, *Chilo partellus* (Swinhoe) under fluctuating and constant temperature conditions. Insect Science and Its Application 12, 419-422.

Sivonen, K. (1990). Effects of light, temperature, nitrate, orthophosphate, and bacteria on growth of and hepatotoxin production by *Oscillatoria agardhii* strains. Applied and Environmental Microbiology 56, 2658-2666.

Smith, A. M. (1984). Larval instar determination and temperature-development studies of immature stages of the common armyworm, *Mythimna convecta* (Walker) (Lepidoptera, Noctuidae). Journal of the Australian Entomological Society 23, 91-97.

Smith, D. G. (1997). Ecological factors influencing the antipredator behaviors of the ground skink, *Scincella lateralis*. Behavioral Ecology 8, 622-629.

Smith, L. B. (1965). The intrinsic rate of natural increase of *Cryptolestes ferrugineus* (Stephens) (Coleoptera: Cucujidae). Journal of Stored Products Research 1, 35-49.

Sorokin, C. and Krauss, R. W. (1962). Effects of temperature and illuminance on *Chlorella* growth uncoupled from cell division. Plant Physiology 37, 37-42.

Stevenson, R. D., Peterson, C. R. and Tsuji, J. S. (1985). The thermal dependence of locomotion, tongue flicking, digestion, and oxygen consumption in the wandering garter snake. Physiological Zoology 58, 46-57.

Summers, C. G., Coviello, R. L. and Gutierrez, A. P. (1984). Influence of constant temperatures on the development and reproduction of *Acyrthosiphon kondoi* (Homoptera, Aphididae). Environmental Entomology 13, 236-242.

Sutcliffe, D. W., Carrick, T. R. and Willoughby, L. G. (1981). Effects of diet, body size, age and temperature on growth rates in the amphipod *Gammarus pulex*. Freshwater Biology 11, 183-214.

Sweeney, J. Y., Kuehne, H. A. and Sniegowski, P. D. (2004). Sympatric natural *Saccharomyces cerevisiae* and *S. paradoxus* populations have different thermal growth profiles. FEMS Yeast Research 4, 521-525.

Syme, P. D. (1972). Influence of constant temperatures on non-diapause development of *Hyssopus thymus* (Hymenoptera: Eulophidae). Canadian Entomologist 104, 113-120.

Takeshita, N., Ikeda, I., Onikura, N., Nishikawa, M., Nagata, S., Matsui, S. and Kimura, S. (2005). Growth of the fourspine sculpin *Cottus kazika* in the Gonokawa River, Japan, and effects of water temperature on growth. Fisheries Science 71, 784-790.

Tanaka, K. (2008). Putting ourselves in a striped snake's shoes: thermal sensitivity of locomotor performance in a melanistic/striped colour-dimorphic snake. Acta Zoologica 89, 211-218.

Tang, E. P. Y., Tremblay, R. and Vincent, W. F. (1997). Cyanobacterial dominance of polar freshwater ecosystems: Are high-latitude mat-formers adapted to low temperature? Journal of Phycology 33, 171-181.

Tang, X. L., Yue, F., He, J. Z., Wang, N. B., Ma, M., Mo, J. R. and Chen, Q. (2013). Ontogenetic and sexual differences of thermal biology and locomotor performance in a lacertid lizard, *Eremias multiocellata*. Zoology 116, 331-335.

Tasaka, Y., Gombos, Z., Nishiyama, Y., Mohanty, P., Ohba, T., Ohki, K. and Murata, N. (1996). Targeted mutagenesis of acyl-lipid desaturases in *Synechocystis*: Evidence for the important roles of polyunsaturated membrane lipids in growth, respiration and photosynthesis. EMBO Journal 15, 6416-6425.

Temple, G. K. and Johnston, I. A. (1998). Testing hypotheses concerning the phenotypic plasticity of escape performance in fish of the family Cottidae. Journal of Experimental Biology 201, 317-331.

Toapanta, M. A., Schuster, D. J. and Stansly, P. A. (2005). Development and life history of *Anthonomus eugenii* (Coleoptera : Curculionidae) at constant temperatures. Environmental Entomology 34, 999-1008.

Toft, N. L. and Pearcy, R. W. (1982). Gas exchange characteristics and temperature relations of two desert annuals: A comparison of a winter-active and a summer-active species. Oecologia 55, 170-177.

Tolley, M. P. and Niemczyk, H. D. (1988). Upper and lower threshold temperatures and degree-day estimates for development of the frit fly (Diptera, Chloropidae) at eight constant temperatures. Journal of Economic Entomology 81, 1346-1351.

Tsai, J. H. and Liu, Y. H. (1998). Effect of temperature on development, survivorship, and reproduction of rice root aphid (Homoptera: Aphididae). Environmental Entomology 27, 662-666.

Tsujimura, S., Ishikawa, K. and Tsukada, H. (2001). Effect of temperature on growth of the cyanobacterium *Aphanizomenon flos-aquae* in Lake Biwa and Lake Yogo. Phycological Research 49, 275–280.

Tsujimura, S. and Okubo, T. (2003). Development of Anabaena blooms in a small reservoir with dense sediment akinete population, with special reference to temperature and irradiance. Journal of Plankton Research 25, 1059-1067.

Turak, E., Talent, R., Sunnucks, P. and Hales, D. F. (1998). Different responses to temperature in three closely related sympatric cereal aphids. Entomologia Experimentalis et Applicata 86, 49-58.

Urbaneja, A., Hinarejos, R., Llacer, E., Garrido, A. and Jacas, J. A. (2002). Effect of temperature, on life history of *Cirrospilus vittatus* (Hymenoptera: Eulophidae), an ectoparasitoid of *Phyllocnistis citrella* (Lepidoptera : Gracillariidae). Journal of Economic Entomology 95, 250-255.

Urbaneja, A., Llacer, E., Tomas, O., Garrido, A. and Jacas, J. A. (1999). Effect of temperature on development and survival of *Cirrospilus* sp. near *lyncus* (Hymenoptera : Eulophidae), parasitoid of *Phyllocnistis citrella* (Lepidoptera : Gracillariidae). Environmental Entomology 28, 339-344.

Vallejos, C. E. and Pearcy, R. W. (1987). Differential acclimation potential to low temperatures in two species of *Lycopersicon*: Photosynthesis and growth. Canadian Journal of Botany 65, 1303-1307.

van Berkum, F. H. (1986). Evolutionary patterns of the thermal sensitivity of sprint speed in *Anolis* lizards. Evolution 40, 594-604.

van Berkum, F. H., Huey, R. B. and Adams, B. A. (1986). Physiological consequences of thermoregulation in a tropical lizard (*Ameiva festiva*). Physiological Zoology 59, 464-472.

van der Westhuizen, A. J. and Eloff, J. N. (1985). Effect of temperature and light on the toxicity and growth of the blue-green alga *Microcystis aeruginosa* (Uv-006). Planta 163, 55-59.

Vargas, R. I., Walsh, W. A., Kanehisa, D., Jang, E. B. and Armstrong, J. W. (1997). Demography of four Hawaiian fruit flies (Diptera: Tephritidae) reared at five constant temperatures. Annals of the Entomological Society of America 90, 162-168.

Venette, R. C. and Ferris, H. (1997). Thermal constraints to population growth of bacterial-feeding nematodes. Soil Biology & Biochemistry 29, 63-74.

Veres, J. S. and Williams, G. J. (1984). Time course of photosynthetic temperature acclimation in *Carex eleocharis* Bailey. Plant Cell and Environment 7, 545-547.

Vidal, C., Fargues, J. and Lacey, L. A. (1997). Intraspecific variability of *Paecilomyces fumosoroseus*: Effect of temperature on vegetative growth. Journal of Invertebrate Pathology 70, 18-26.

Vincent, W. F. and Silvester, W. B. (1979). Growth of blue-green algae in the Manukau (New Zealand) oxidation ponds. 1. Growth potential of oxidation pond water and comparative optima for blue-green and green algal growth. Water Research 13, 711-716.

Vogt, W. G., Walker, J. M. and Runko, S. (1990). Estimation of development times for immature stages of the bush fly, *Musca vetustissima* Walker (Diptera, Muscidae), and their simulation from air temperature and solar radiation records. Bulletin of Entomological Research 80, 73-78.

von Klein, D., Arab, H., Volker, H. and Thomm, M. (2002). *Methanosarcina baltica*, sp. nov., a novel methanogen isolated from the Gotland Deep of the Baltic Sea. Extremophiles 6, 103-110.

Vona, V., Rigano, V. D., Lobosco, O., Carfagna, S., Esposito, S. and Rigano, C. (2004). Temperature responses of growth, photosynthesis, respiration and NADH: nitrate reductase in cryophilic and mesophilic algae. New Phytologist 163, 325-331.

Wang, J. J., Tsai, J. H., Zhao, Z. M. and Li, L. S. (2000). Development and reproduction of the psocid *Liposcelis bostrychophila* (Psocoptera : Liposcelididae) as a function of temperature. Annals of the Entomological Society of America 93, 261-270.

Wang, K. H. and Tsai, J. H. (1996). Temperature effect on development and reproduction of silverleaf whitefly (Homoptera: Aleyrodidae). Annals of the Entomological Society of America 89, 375-384.

Wang, K. H., Tsai, J. H. and Harrison, N. A. (1997). Influence of temperature on development, survivorship, and reproduction of buckthorn aphid (Homoptera: Aphididae). Annals of the Entomological Society of America 90, 62-68.

Wang, W., Song, X. K. and Ru, S. G. (2007). Studies on the factors affecting the growth and hemolytic activity of *Anabaena variabilis*. Journal of Applied Phycology 19, 365-371.

Watkins, T. B. (2000). The effects of acute and developmental temperature on burst swimming speed and myofibrillar ATPase activity in tadpoles of the pacific tree frog, *Hyla regilla*. Physiological and Biochemical Zoology 73, 356-364.

Weisse, T., Stadler, P., Lindstrom, E. S., Kimmance, S. A. and Montagnes, D. J. S. (2002). Interactive effect of temperature and food concentration on growth rate: A test case using the small freshwater ciliate *Urotricha farcta*. Limnology and Oceanography 47, 1447-1455.

Wellings, P. W. (1981). The effect of temperature on the growth and reproduction of two closely related aphid species on sycamore. Ecological Entomology 6, 209-214.

Whitehead, P. J., Puckridge, J. T., Leigh, C. M. and Seymour, R. S. (1989). Effect of temperature on jump performance of the frog *Limnodynastes tasmaniensis*. Physiological Zoology 62, 937-949.

Whitfield, G. H. and Richards, K. W. (1985). Influence of temperature on survival and rate of development of *Pteromalus venustus* (Hymenoptera, Pteromalidae), a parasite of the alfalfa leafcutter bee (Hymenoptera, Megachilidae). Canadian Entomologist 117, 811-818.

Whitledge, G. W. and Rabeni, C. F. (2002). Maximum daily consumption and respiration rates at four temperatures for five species of crayfish from Missouri, USA (Decapoda, Orconectes spp.). Crustaceana 75, 1119-1132.

Williams, D. G. and Black, R. A. (1993). Phenotypic variation in contrasting temperature environments: Growth and photosynthesis in *Pennisetum setaceum* from different altitudes on Hawaii. Functional Ecology 7, 623-633.

Wilson, R. S. (2001). Geographic variation in thermal sensitivity of jumping performance in the frog *Limnodynastes peronii*. Journal of Experimental Biology 204, 4227-4236.

Wilson, R. S. (2005). Temperature influences the coercive mating and swimming performance of male eastern mosquitofish. Animal Behaviour 70, 1387-1394.

Xia, J. Y., van der Werf, W. and Rabbinge, R. (1999). Influence of temperature on bionomics of cotton aphid, *Aphis gossypii*, on cotton. Entomologia Experimentalis et Applicata 90, 25-35.

Xiang, J., Weiguo, D. and Pingyue, S. (1996). Body temperature, thermal tolerance and influence of temperature on sprint speed and food assimilation in adult grass lizards, *Takydromus septentrionalis*. Journal of Thermal Biology 21, 155-161.

Xu, X. F. and Ji, X. (2006). Ontogenetic shifts in thermal tolerance, selected body temperature and thermal dependence of food assimilation and locomotor performance in a lacertid lizard, *Eremias brenchleyi*. Comparative Biochemistry and Physiology a-Molecular & Integrative Physiology 143, 118-124.

Yamahira, K. and Conover, D. O. (2002). Intra- vs. interspecific latitudinal variation in growth: Adaptation to temperature or seasonality? Ecology 83, 1252-1262.

Yamori, W., Evans, J. R. and Von Caemmerer, S. (2010a). Effects of growth and measurement light intensities on temperature dependence of CO2 assimilation rate in tobacco leaves. Plant Cell and Environment 33, 332-343.

Yamori, W., Hikosaka, K. and Way, D. A. (2014). Temperature response of photosynthesis in C3, C4, and CAM plants: temperature acclimation and temperature adaptation. Photosynthesis Research 119, 101-117.

Yamori, W., Noguchi, K., Hanba, Y. T. and Terashima, I. (2006a). Effects of internal conductance on the temperature dependence of the photosynthetic rate in spinach leaves from contrasting growth temperatures. Plant and Cell Physiology 47, 1069-1080.

Yamori, W., Noguchi, K., Hikosaka, K. and Terashima, I. (2010b). Phenotypic plasticity in photosynthetic temperature acclimation among crop species with different cold tolerances. Plant Physiology 152, 388-399.

Yamori, W., Noguchi, K., Kashino, Y. and Terashima, I. (2008). The role of electron transport in determining the temperature dependence of the photosynthetic rate in spinach leaves grown at contrasting temperatures. Plant and Cell Physiology 49, 583-591.

Yamori, W., Noguchi, K. and Terashima, I. (2005). Temperature acclimation of photosynthesis in spinach leaves: analyses of photosynthetic components and temperature dependencies of photosynthetic partial reactions. Plant Cell and Environment 28, 536-547.

Yamori, W., Suzuki, K., Noguchi, K., Nakai, M. and Terashima, I. (2006b). Effects of Rubisco kinetics and Rubisco activation state on the temperature dependence of the photosynthetic rate in spinach leaves from contrasting growth temperatures. Plant Cell and Environment 29, 1659-1670.

Yang, P., Zhou, C., Liang, G., Dowell, R. V. and Carey, J. R. (1994b). Temperature studies on a Chinese strain of *Bactrocera cucurbitae* (Coquillett) (Diptera, Tephritidae). Pan-Pacific Entomologist 70, 269-275.

Yang, P. J., Carey, J. R. and Dowell, R. V. (1994a). Temperature influences on the development and demography of *Bactrocera dorsalis* (Diptera, Tephritidae) in China. Environmental Entomology 23, 971-974.

Youssef, M. K., Adolph, S. C. and Richmond, J. Q. (2008). Evolutionarily conserved thermal biology across continents: The North American lizard *Plestiodon gilberti* (Scincidae) compared to Asian Plestiodon. Journal of Thermal Biology 33, 308-312.

Yu, X. M., Zhang, X. M., Duan, Y., Zhang, P. D. and Miao, Z. Q. (2010). Effects of temperature, salinity, body length, and starvation on the critical swimming speed of whiteleg shrimp, *Litopenaeus vannamei*. Comparative Biochemistry and Physiology a-Molecular & Integrative Physiology 157, 392-397.

Yue, L. H. and Chen, W. G. (2005). Isolation and determination of cultural characteristics of a new highly CO2 tolerant freshwater microalgae. Energy Conversion and Management 46, 1868-1876.

Zajitschek, S. R. K., Zajitschek, F., Miles, D. B. and Clobert, J. (2012). The effect of coloration and temperature on sprint performance in male and female wall lizards. Biological Journal of the Linnean Society 107, 573-582.

Zamani, A. A., Talebi, A. A., Fathipour, Y. and Baniameri, V. (2006). Effect of temperature on biology and population growth parameters of *Aphis gossypii* Glover (Hom., Aphididae) on greenhouse cucumber. Journal of Applied Entomology 130, 453-460.

Zeng, L. Q., Cao, Z. D., Fu, S. J., Peng, J. L. and Wang, Y. X. (2009). Effect of temperature on swimming performance in juvenile southern catfish (*Silurus meridionalis*). Comparative Biochemistry and Physiology a-Molecular & Integrative Physiology 153, 125-130.

Zhang, P. D., Zhang, X. M., Li, J. and Huang, G. Q. (2007). The effects of temperature and salinity on the swimming ability of whiteleg shrimp, *Litopenaeus vannamei*. Comparative Biochemistry and Physiology a-Molecular & Integrative Physiology 147, 64-69.

Zhang, T., Li, L., Song, L. R. and Chen, W. (2009). Effects of temperature and light on the growth and geosmin production of *Lyngbya kuetzingii* (Cyanophyta). Journal of Applied Phycology 21, 279-285.

Zhang, Y. P. and Ji, X. A. (2004). The thermal dependence of food assimilation and locomotor performance in southern grass lizards, *Takydromus sexlineatus* (Lacertidae). Journal of Thermal Biology 29, 45-53.

Ziska, L. H. (2001). Growth temperature can alter the temperature dependent stimulation of photosynthesis by elevated carbon dioxide in *Albutilon theophrasti*. Physiologia Plantarum 111, 322-328.

**References**

1. Kenward MG & Roger JH (1997) The precision of fixed effects estimated from restricted maximum likelihood. Biometrics 53:983-997.

2. Frazier MR, Huey RB, & Berrigan D (2006) Thermodynamics constrains the evolution of insect population growth rates: "Warmer is better". American Naturalist 168:512-520.

3. Hodar JA (1996) The use of regression equations for estimation of arthropod biomass in ecological studies. Acta Oecologica 17:421-433.

4. Ganihar SR (1997) Biomass estimates of terrestrial arthropods based on body length. Journal of Bioscience 22:219-224.
